# Supplementary material for: Computational Metabolomics Tools Reveal Subarmigerides, Unprecedented Linear Peptides from the Marine Sponge Holobiont Callyspongia subarmigera
Source: MDPI journal article supplement (doi:10.3390/md20110673), 2022-10-27

## Article

# Computational Metabolomics Tools Reveal Subarmigerides, Unprecedented Linear Peptides from the Marine Sponge Holobiont *Callyspongia subarmigera*

Andrea Castaldi,<sup>1a</sup> Roberta Teta,<sup>2a</sup> Germana Esposito,<sup>2</sup> Mehdi A. Beniddir,<sup>3\*</sup> Nicole J. de Voogd,<sup>4,5</sup> Sébastien Duperron,<sup>1</sup> Valeria Costantino,<sup>2\*</sup> and Marie-Lise Bourguet-Kondracki<sup>1\*</sup>

<sup>1</sup> *Molécules de Communication et Adaptation des Microorganismes, UMR 7245 CNRS, Muséum National d'Histoire Naturelle, 57 rue Cuvier (CP54), 75005 Paris, France.*

<sup>2</sup> *The Blue Chemistry Lab Group, Dipartimento di Farmacia, Università degli Studi di Napoli Federico II, via D. Montesano 49, 80131 Napoli, Italy*

<sup>3</sup> *Équipe "Chimie des substances naturelles" BioCIS, CNRS, Université Paris-Saclay, 17 avenue des Sciences, 91400 Orsay, France.*

<sup>4</sup> *Naturalis Biodiversity Center, PO Box 9517, 2300 RA Leiden, The Netherlands*

<sup>5</sup> *Institute of Environmental Sciences, Leiden University, Einsteinweg 2, 2333 CC Leiden, The Netherlands*

<sup>a</sup> *Equally contribution*

*\* Author to whom correspondence should be addressed*

**Figure S1:** A) The molecular networking obtained through the LC-MS/MS analysis of the 33 extracts of Haplosclerida sponge collection. B) Zoom view of the discriminant cluster of the *Callyspongia* genus.

**Figure S2:** A) The molecular networking obtained through the LC-MS/MS analysis of cyanobacterial strains extracts from Guadeloupe's mangroves. B) Zoom view of the peptide.

**Figure S3:** <sup>1</sup>H-NMR spectrum of subarmigeride A (**1**) (600 MHz, DMSO-*d*<sub>6</sub>).

**Figure S4:** DEPTQ-NMR spectrum of subarmigeride A (**1**) (150 MHz, DMSO-*d*<sub>6</sub>).

**Figure S5:** COSY-NMR spectrum of subarmigeride A (**1**) (600 MHz, DMSO-*d*<sub>6</sub>).

**Figure S6:** TOCSY-NMR spectrum of subarmigeride A (**1**) (600 MHz, DMSO-*d*<sub>6</sub>).

**Figure S7:** HSQC-NMR spectrum of subarmigeride A (**1**) (600 MHz, DMSO-*d*<sub>6</sub>).

**Figure S8:** HMBC-NMR spectrum of subarmigeride A (**1**) (600 MHz, DMSO-*d*<sub>6</sub>).

**Figure S9:** NOESY-NMR spectrum of subarmigeride A (**1**) (600 MHz, DMSO-*d*<sub>6</sub>).

**Figure S10:** Fragmentations pattern and positive ion mode high-resolution ESI MS/MS spectrum for subarmigeride A (**1**) (*m/z* 857.4914 [M + H]<sup>+</sup>).

**Figure S11:** Marfey's analysis in positive ion mode high-resolution ESI mass spectrum of subarmigeride A (**1**).

**Figure S12:** Fragmentations pattern and positive ion mode high-resolution ESI MS/MS spectrum for subarmigeride B (**2**) (*m/z* 823.5078 [M + H]<sup>+</sup>).

**Figure S13:** Fragmentations pattern and positive ion mode high-resolution ESI MS/MS spectrum for subarmigeride C (**3**) (*m/z* 839.5024 [M + H]<sup>+</sup>).

**Figure S14:** Fragmentations pattern and positive ion mode high-resolution ESI MS/MS spectrum for subarmigeride D (**4**) (*m/z* 829.4962 [M + H]<sup>+</sup>).

**Figure S15:** Fragmentations pattern and positive ion mode high-resolution ESI MS/MS spectrum for subarmigeride E (**5**) (*m/z* 767.4807 [M + H]<sup>+</sup>).

**Figure S16:** Fragmentations pattern and positive ion mode high-resolution ESI MS/MS spectrum for subarmigeride F (**6**) ( $m/z$  768.4650 [M + H]<sup>+</sup>).

**Figure S17:** Fragmentations pattern and positive ion mode high-resolution ESI MS/MS spectrum for subarmigeride G (**7**) ( $m/z$  938.5698 [M + H]<sup>+</sup>).

**Figure S18:** Fragmentations pattern and positive ion mode high-resolution ESI MS/MS spectrum for subarmigeride H (**8**) ( $m/z$  795.4763 [M + H]<sup>+</sup>).

**Figure S19:** Comparison of MS/MS spectra of the feature  $m/z$  857.4920 at 6.036 min in the cyanobacterial strain PMC 1052.18 (*Spirulina* sp.) from a mangrove in Guadeloupe. (A) and the feature  $m/z$  857.4909 at 5.934 min in the marine sponge *C. subarmigera* (B). Comparison of extracted ion chromatograms for  $m/z$  857.4912 (tolerance 10 ppm) from the crude extracts of the cyanobacterial strain PMC 1052.18 (C) and the marine sponge *C. subarmigera* (D).

**Figure S20:** Helically coiled morphology of *Spirulina* sp. PMC 1052.18.

**Figure S21:** Molecular networks obtained using the Feature-Based Molecular Network workflow on GNPS (<https://gnps.ucsd.edu/ProteoSAFe/status.jsp?task=8a40068370b44e21855c1e14647ff23a>).

**Table S1:** Product ion spectra data for subarmigeride B (**2**) ( $m/z$  823.5078 [M + H]<sup>+</sup>).

**Table S2:** Product ion spectra data for subarmigeride C (**3**) ( $m/z$  839.5024 [M + H]<sup>+</sup>).

**Table S3:** Product ion spectra data for subarmigeride D (**4**) ( $m/z$  829.4962 [M + H]<sup>+</sup>).

**Table S4:** Product ion spectra data for subarmigeride E (**5**) ( $m/z$  767.4807 [M + H]<sup>+</sup>).

**Table S5:** Product ion spectra data for subarmigeride F (**6**) ( $m/z$  768.4650 [M + H]<sup>+</sup>).

**Table S6:** Product ion spectra data for subarmigeride G (**7**) ( $m/z$  938.5698 [M + H]<sup>+</sup>).

**Table S7:** Product ion spectra data for subarmigeride H (**8**) ( $m/z$  795.4763 [M + H]<sup>+</sup>).

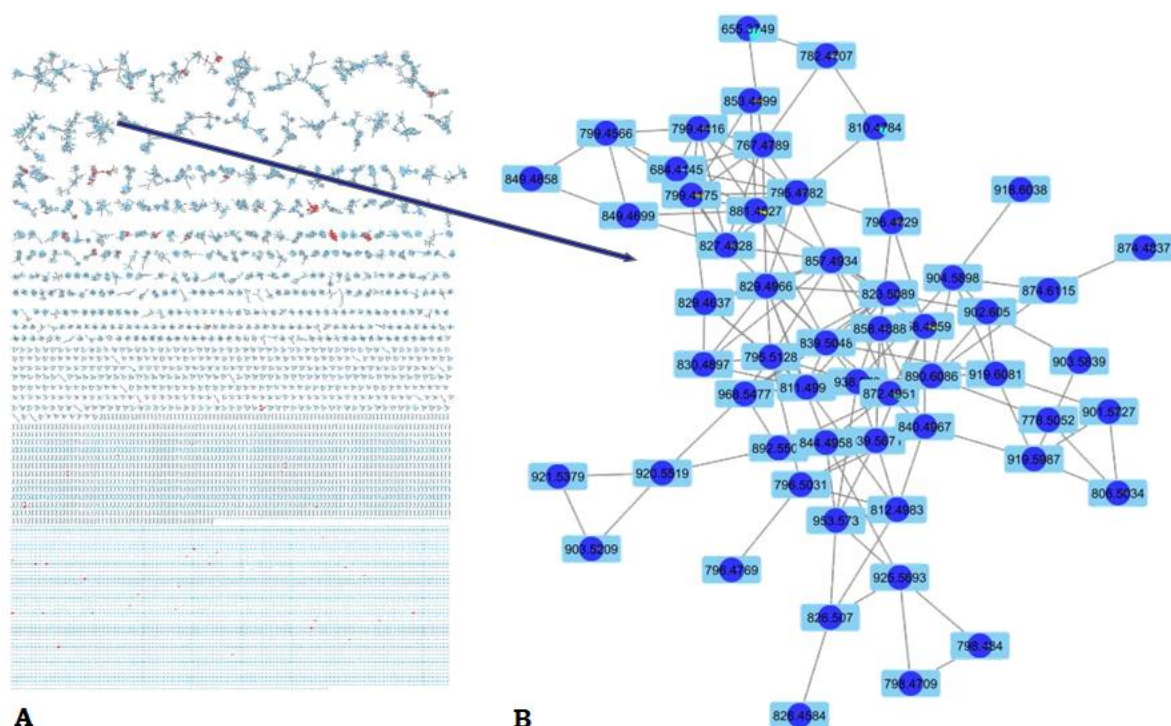

**Figure S1:** A) The molecular networking obtained through the LC-MS/MS analysis of the 33 extracts of Haplosclerida sponge collection. B) Zoom view of the discriminant cluster of the *Callyspongia* genus.

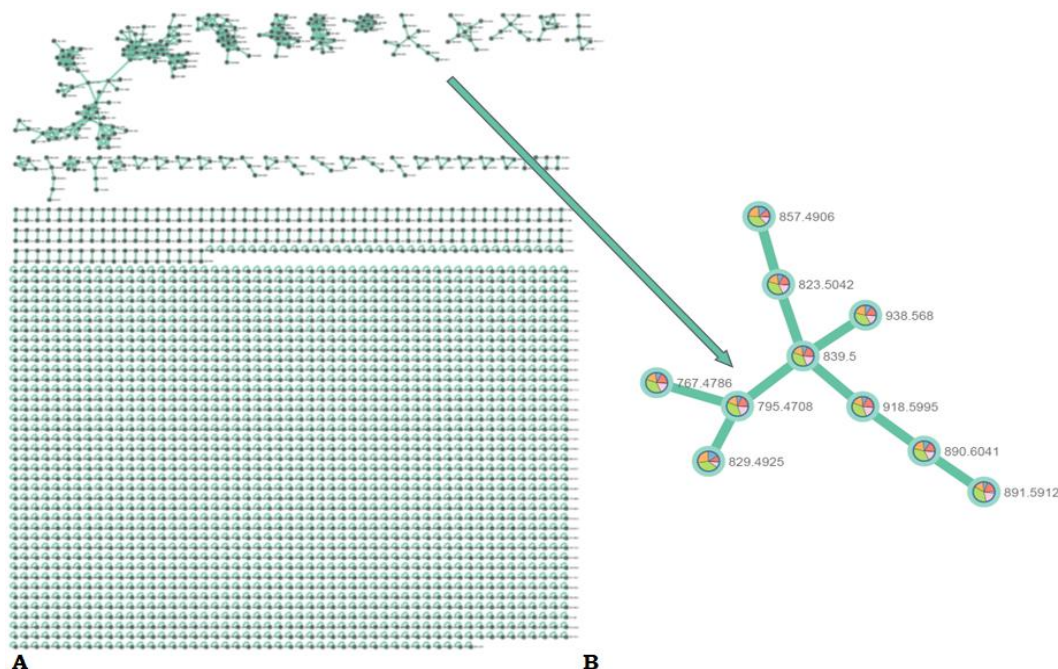

**Figure S2:** A) The molecular networking obtained through the LC-MS/MS analysis of cyanobacterial strains extracts from Guadeloupe's mangroves. B) Zoom view of the peptide

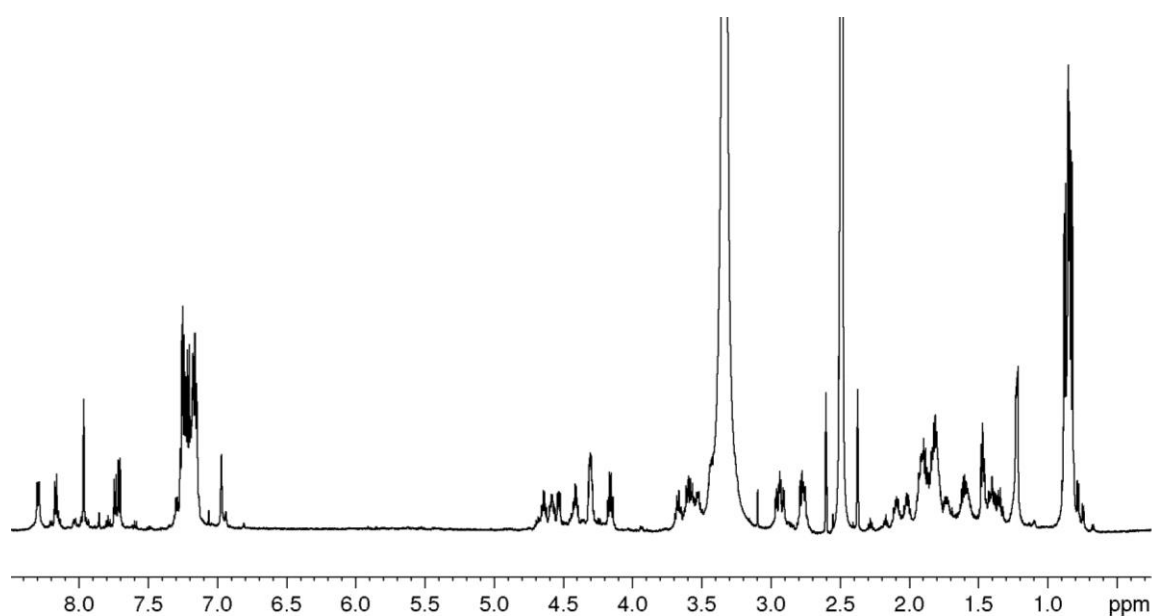

**Figure S3:**  $^1\text{H}$ -NMR spectrum of subarmigeride A (**1**) (600 MHz,  $\text{DMSO}-d_6$ ).

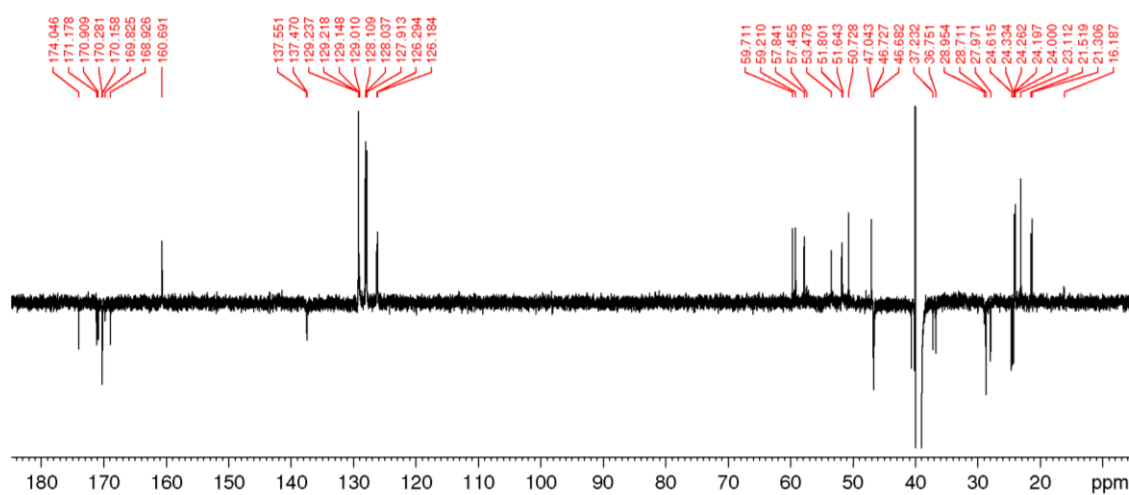

**Figure S4:** DEPTQ-NMR spectrum of subarmigeride A (**1**) (150 MHz,  $\text{DMSO}-d_6$ ).



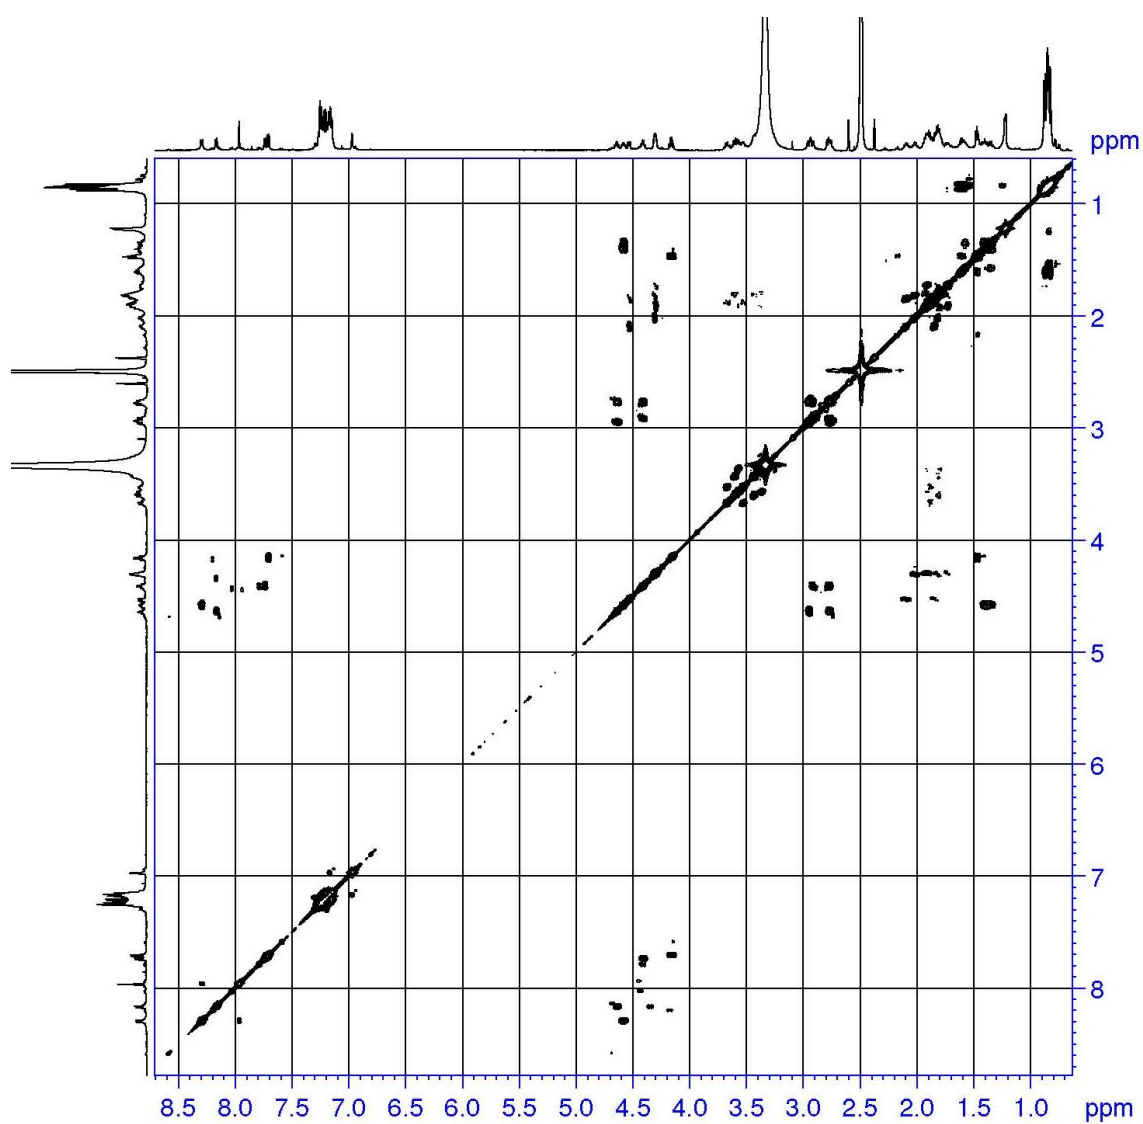

**Figure S5:** COSY-NMR spectrum of subarmigeride A (**1**) (600 MHz, DMSO-*d*<sub>6</sub>).

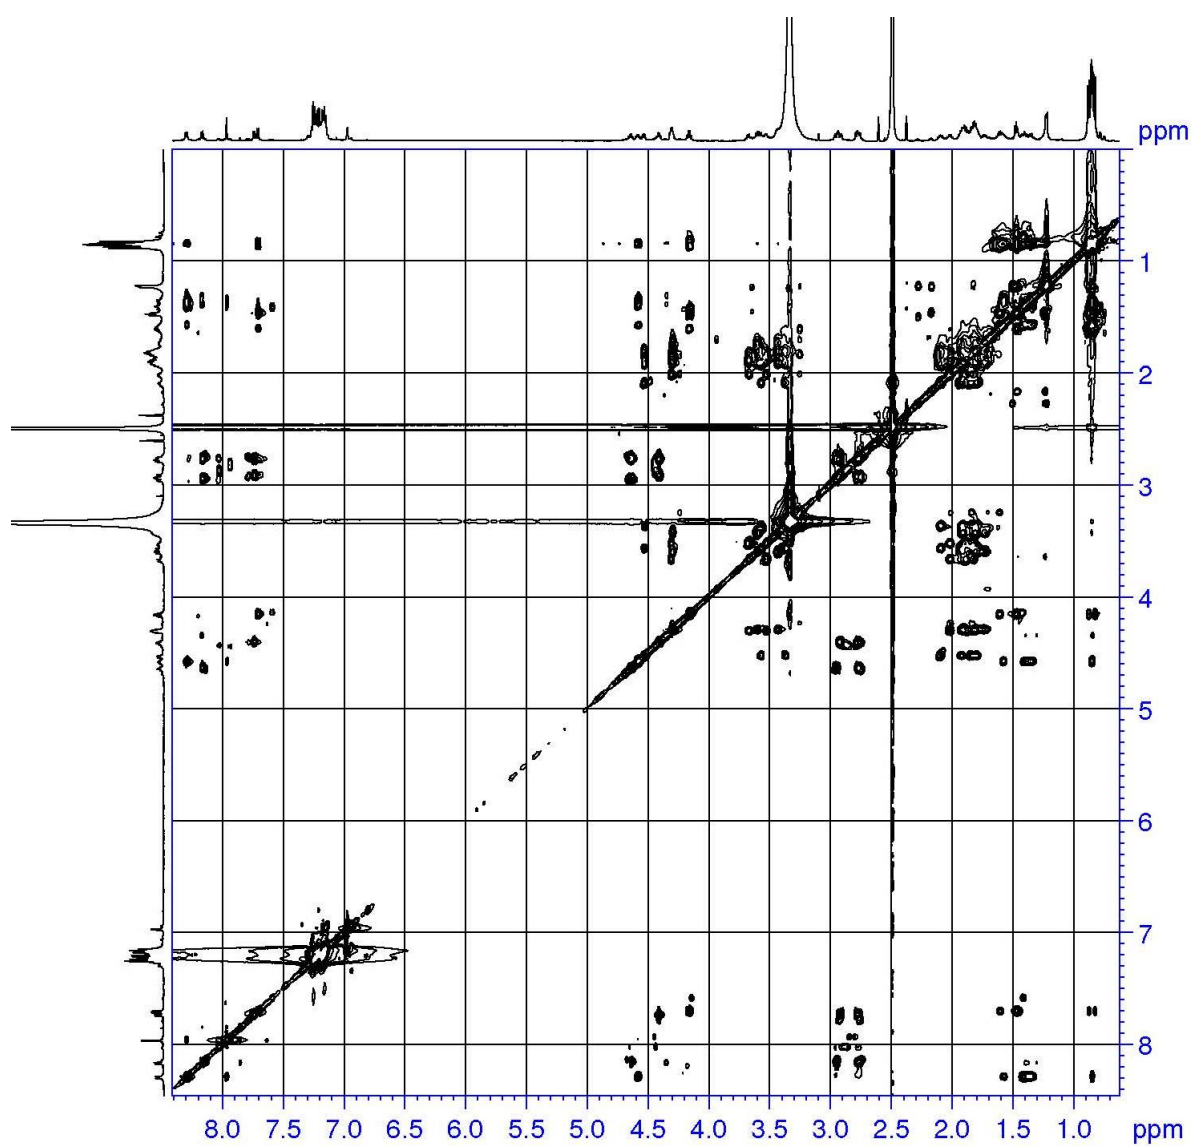

**Figure S6:** TOCSY-NMR spectrum of subarmigeride A (1) (600 MHz, DMSO-*d*<sub>6</sub>).

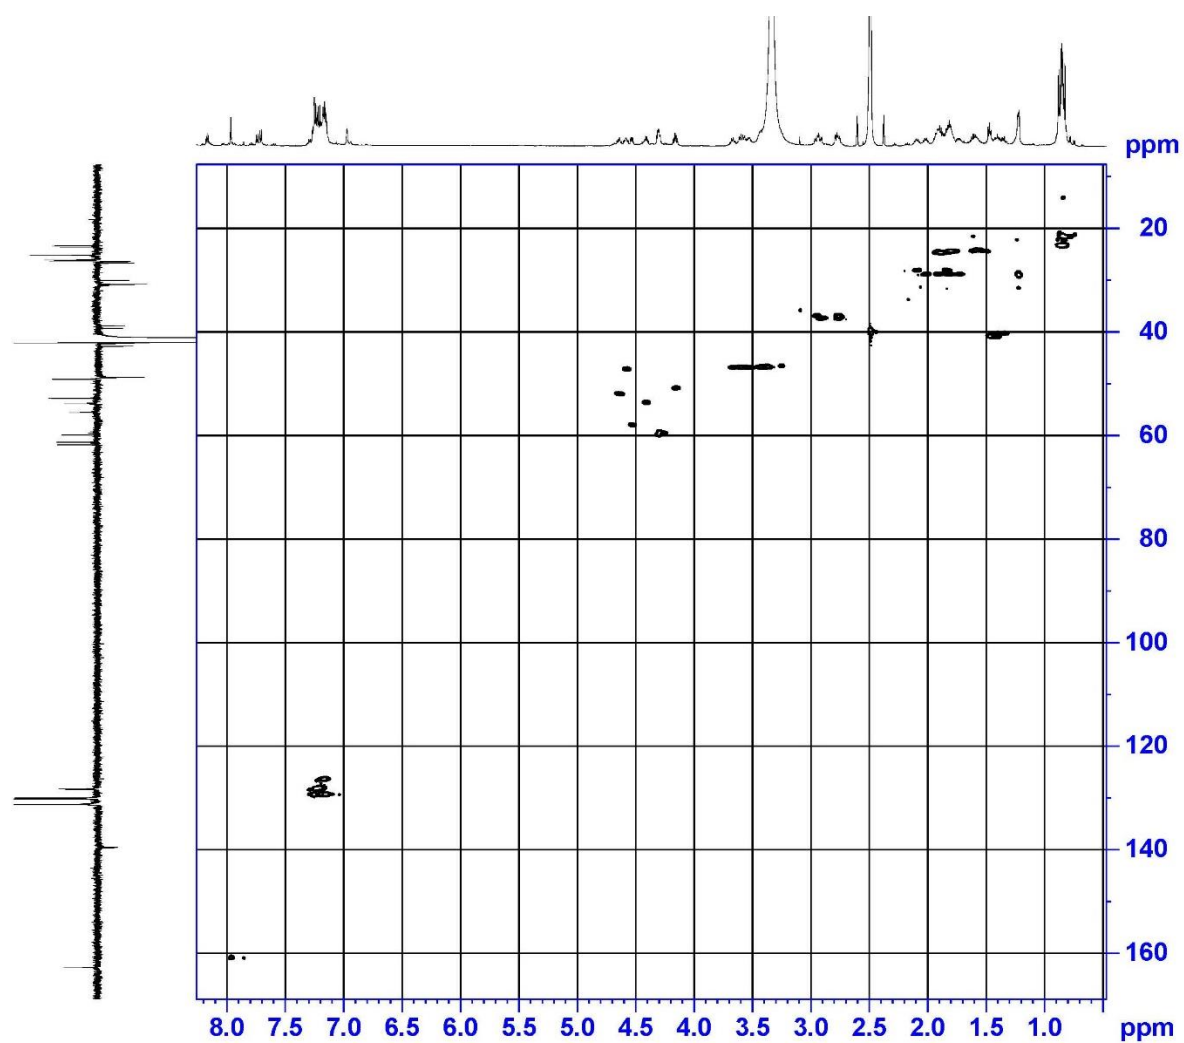

Figure S7: HSQC-NMR spectrum of subarmigeride A (**1**) (600 MHz, DMSO-*d*<sub>6</sub>).

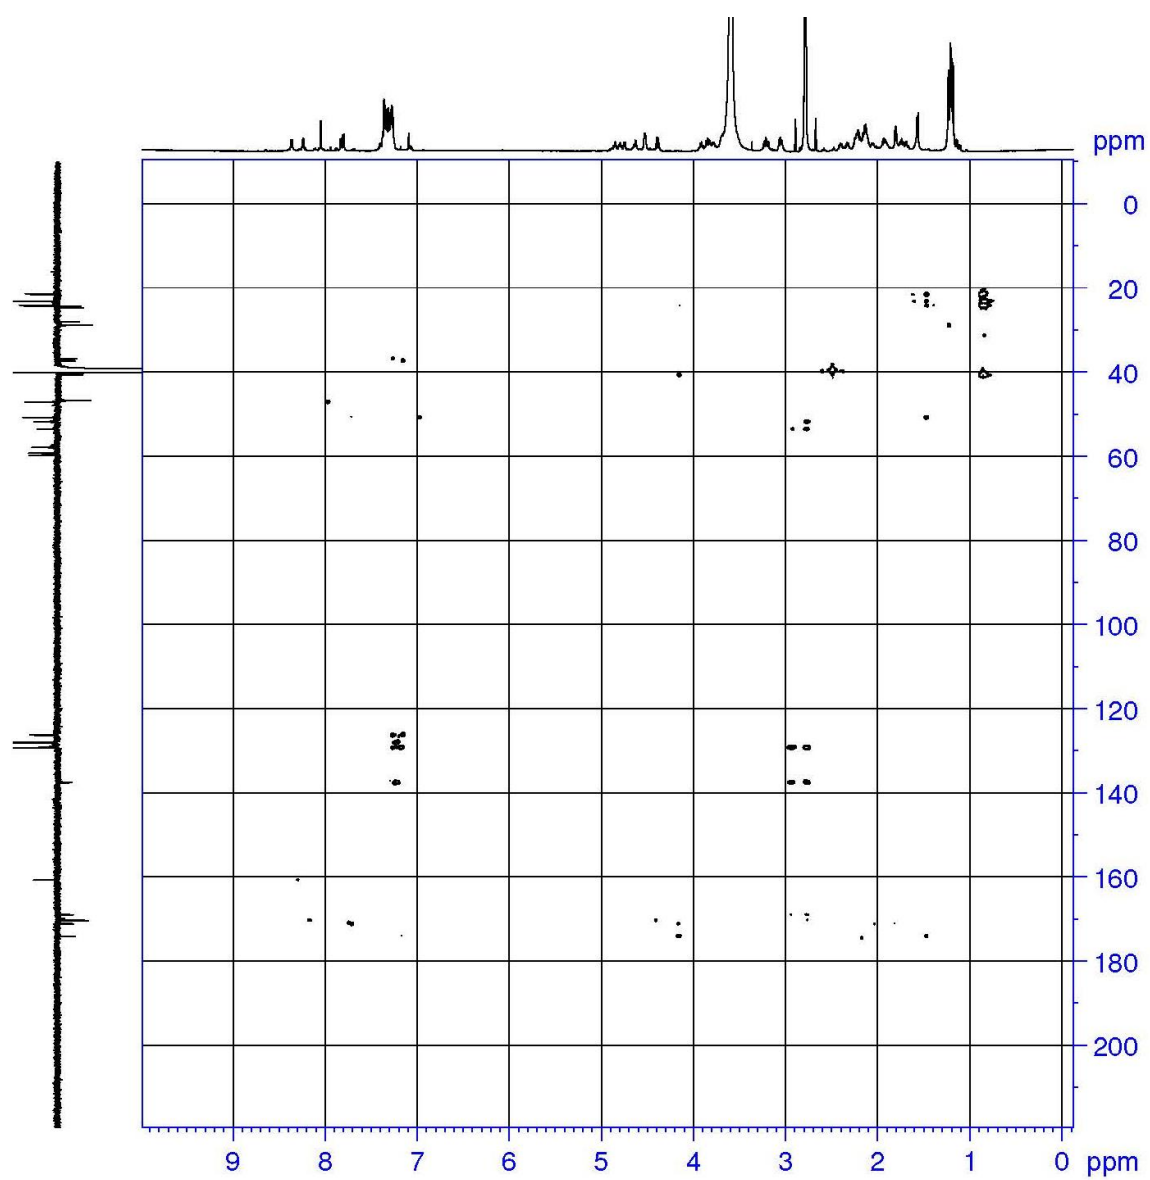

Figure S8: HMBC-NMR spectrum of subarmigeride A (1) (600 MHz, DMSO-*d*<sub>6</sub>).

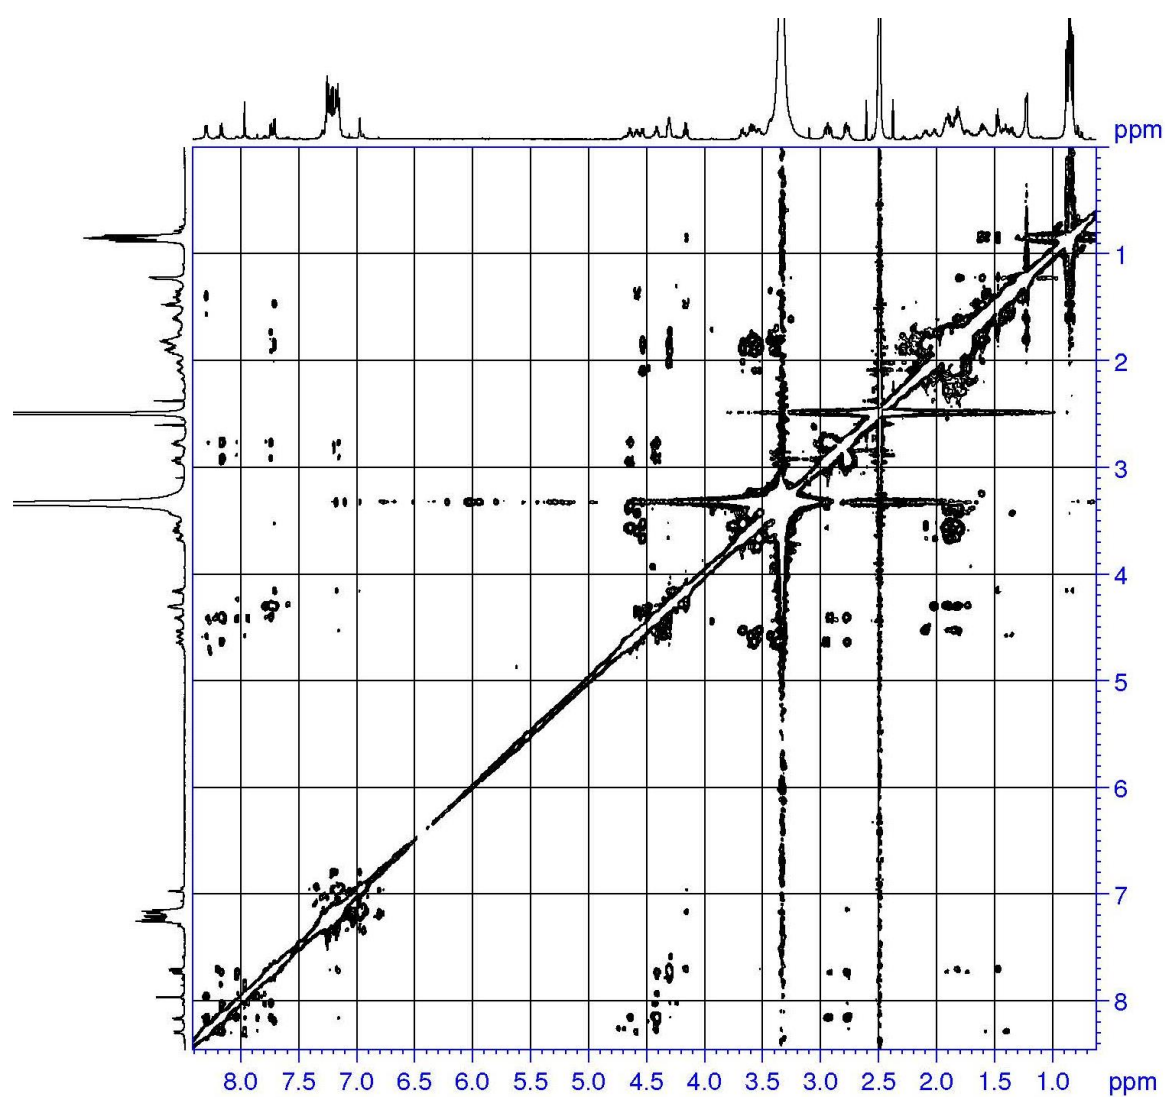

**Figure S9:** NOESY-NMR spectrum of subarmigeride A (**1**) (600 MHz, DMSO-*d*<sub>6</sub>).



**Figure S10:** Fragmentations pattern and positive ion mode high-resolution ESI MS/MS spectrum for subarmigeride A (**1**) ( $m/z$  857.4914 [ $M + H$ ] $^+$ ).

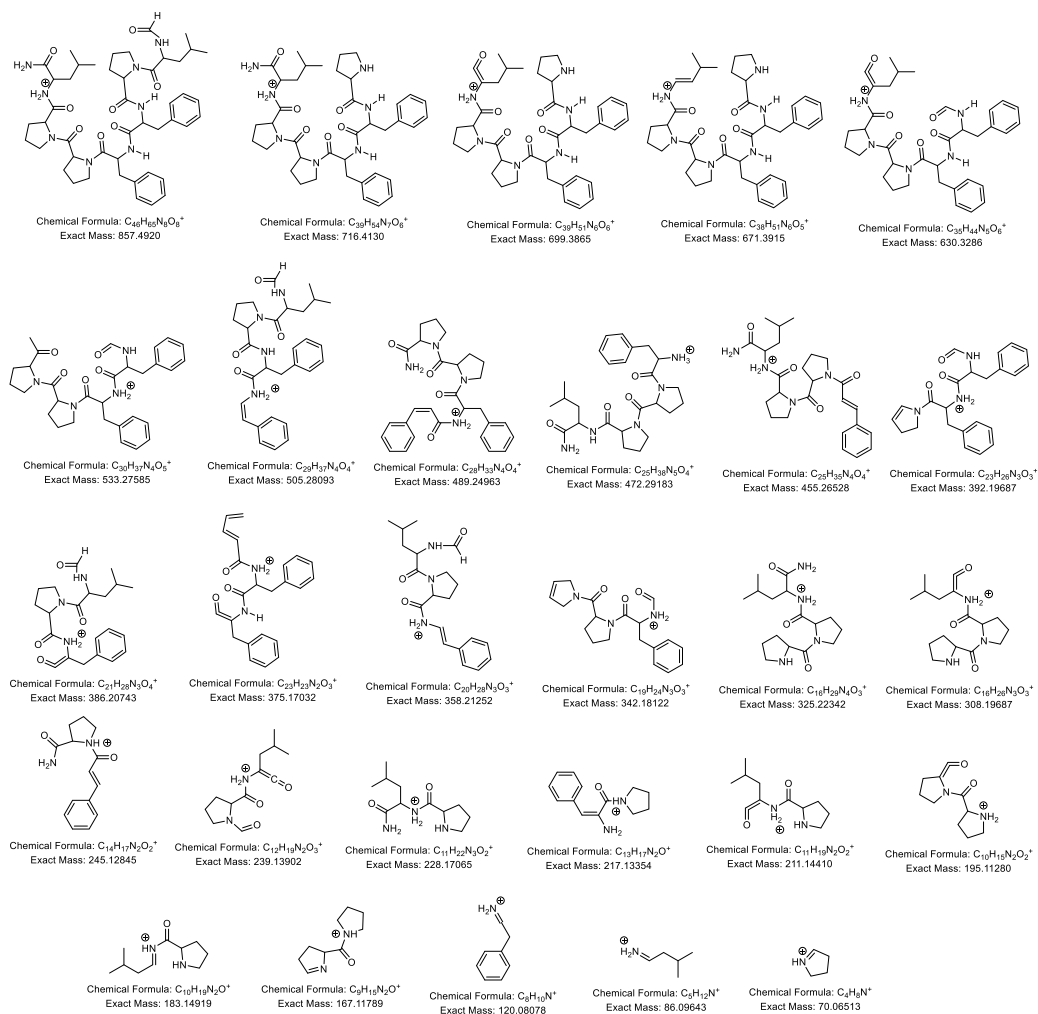

#### Acquisition Parameter

|             |            |                      |          |                  |           |
|-------------|------------|----------------------|----------|------------------|-----------|
| Source Type | ESI        | Ion Polarity         | Positive | Set Nebulizer    | 2.4 Bar   |
| Focus       | Not active | Set Capillary        | 3500 V   | Set Dry Heater   | 200 °C    |
| Scan Begin  | 50 m/z     | Set End Plate Offset | -500 V   | Set Dry Gas      | 8.0 l/min |
| Scan End    | 1300 m/z   | Set Charging Voltage | 2000 V   | Set Divert Valve | Waste     |
|             |            | Set Corona           | 0 nA     | Set APCI Heater  | 0 °C      |

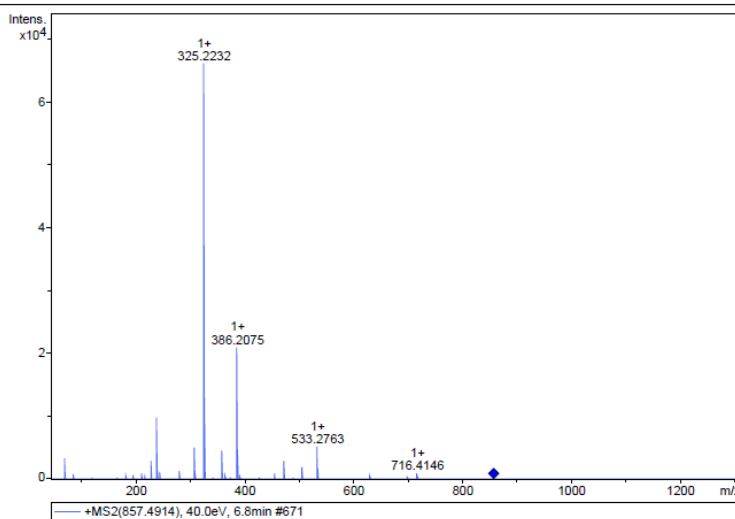

**Figure S11:** Marfey's analysis in positive ion mode high-resolution ESI mass spectrum of subarmigeride A (1).

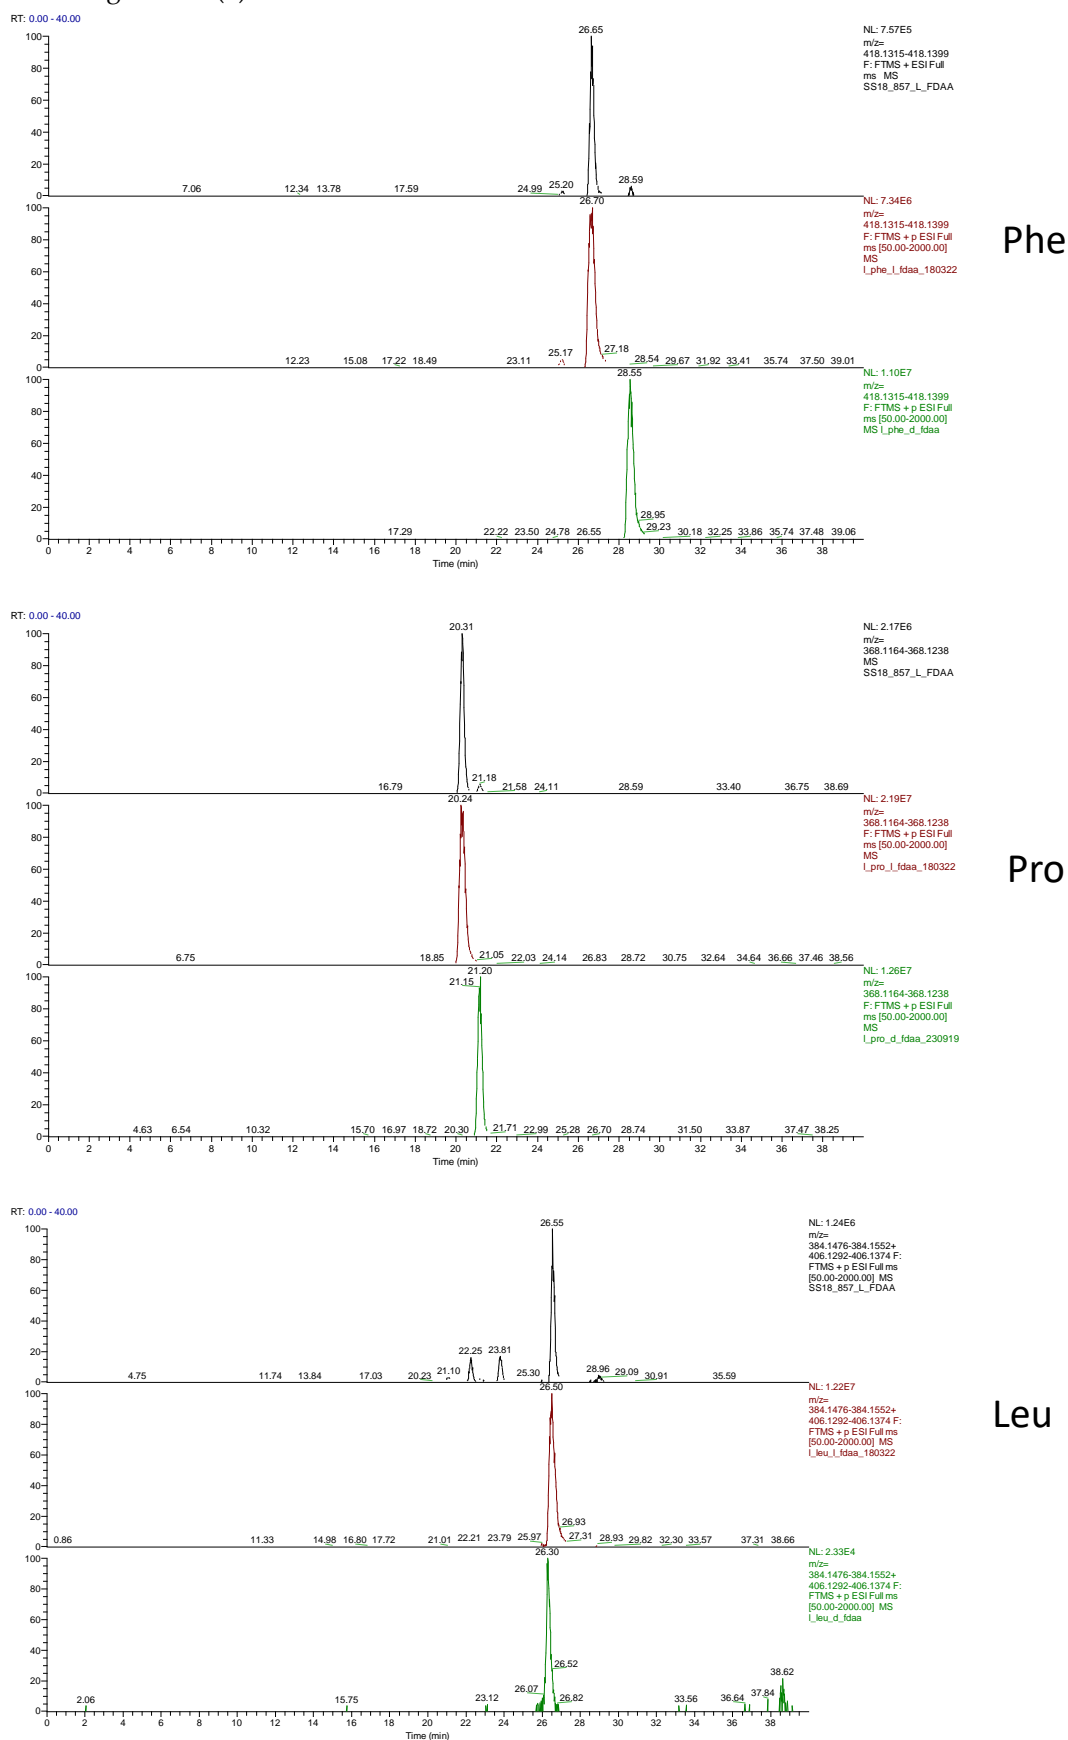

**Table S1:** Product ion spectra data for subarmigeride B (2) ( $m/z$  823.5078  $[M + H]^+$ )

| Product ion Assignment                                                        | ( $m/z$ ) | Error, pm | Molecular Formula                                             |
|-------------------------------------------------------------------------------|-----------|-----------|---------------------------------------------------------------|
| CHO-Ile/Leu- Ile/Leu-Pro-Phe-Pro-Pro-Ile/Leu-NH <sub>2</sub> + H <sup>+</sup> | 823.5076  | -0.2      | C <sub>43</sub> H <sub>67</sub> N <sub>8</sub> O <sub>8</sub> |
| CHO-Ile/Leu- Ile/Leu-Pro-Phe-Pro-Pro + H <sup>+</sup>                         | 665.4012  | 1.4       | C <sub>36</sub> H <sub>53</sub> N <sub>6</sub> O <sub>6</sub> |
| CHO-Ile/Leu- Ile/Leu-Pro-Phe-Pro + H <sup>+</sup>                             | 596.3429  | 2.2       | C <sub>32</sub> H <sub>46</sub> N <sub>5</sub> O <sub>6</sub> |
| CHO-Ile/Leu-Ile/Leu-Pro-Phe + H <sup>+</sup>                                  | 499.2911  | 0.9       | C <sub>27</sub> H <sub>39</sub> N <sub>4</sub> O <sub>5</sub> |
| Phe-Pro-Pro-Ile/Leu + H <sup>+</sup>                                          | 472.2921  | -0.6      | C <sub>25</sub> H <sub>38</sub> N <sub>5</sub> O <sub>4</sub> |
| Phe-Pro-Pro-Ile/Leu + H <sup>+</sup>                                          | 427.2690  | 3.2       | C <sub>24</sub> H <sub>35</sub> N <sub>4</sub> O <sub>3</sub> |
| CHO-Ile/Leu-Ile/Leu-Pro + H <sup>+</sup>                                      | 352.2226  | 1.3       | C <sub>18</sub> H <sub>30</sub> N <sub>3</sub> O <sub>4</sub> |
| Ile/Leu-Pro-Phe + H <sup>+</sup>                                              | 330.2166  | 3         | C <sub>19</sub> H <sub>28</sub> N <sub>3</sub> O <sub>2</sub> |
| Pro-Pro-Ile/Leu-NH <sub>2</sub> + H <sup>+</sup>                              | 325.2231  | 1.1       | C <sub>16</sub> H <sub>29</sub> N <sub>4</sub> O <sub>3</sub> |
| Pro-Pro-Ile/Leu + H <sup>+</sup>                                              | 280.2022  | -1        | C <sub>15</sub> H <sub>26</sub> N <sub>3</sub> O <sub>2</sub> |
| Phe-Pro-NH <sub>2</sub> + H <sup>+</sup>                                      | 245.1276  | 3.6       | C <sub>14</sub> H <sub>17</sub> N <sub>2</sub> O <sub>2</sub> |
| Pro-Ile/Leu + H <sup>+</sup>                                                  | 239.1387  | 1.2       | C <sub>12</sub> H <sub>19</sub> N <sub>2</sub> O <sub>3</sub> |
| Pro-Ile/Leu-NH <sub>2</sub> + H <sup>+</sup>                                  | 228.1703  | 1.4       | C <sub>11</sub> H <sub>22</sub> N <sub>3</sub> O <sub>2</sub> |
| Phe-Pro + H <sup>+</sup>                                                      | 217.1328  | 3.2       | C <sub>13</sub> H <sub>17</sub> N <sub>2</sub> O              |
| Pro-Ile/Leu + H <sup>+</sup>                                                  | 211.1442  | -0.7      | C <sub>11</sub> H <sub>19</sub> N <sub>2</sub> O <sub>2</sub> |
| Pro-Pro + H <sup>+</sup>                                                      | 195.1129  | -0.6      | C <sub>10</sub> H <sub>15</sub> N <sub>2</sub> O <sub>2</sub> |
| Pro-Ile/Leu + H <sup>+</sup>                                                  | 183.1488  | 2         | C <sub>10</sub> H <sub>19</sub> N <sub>2</sub> O              |
| Pro-Pro + H <sup>+</sup>                                                      | 167.1179  | 0         | C <sub>9</sub> H <sub>15</sub> N <sub>2</sub> O               |
| Ile/Leu immonium fragment + H <sup>+</sup>                                    | 86.0961   | 3.8       | C <sub>5</sub> H <sub>12</sub> N                              |
| Pro immonium fragment + H <sup>+</sup>                                        | 70.0647   | 6.5       | C <sub>4</sub> H <sub>8</sub> N                               |

**Figure S12:** Fragmentations pattern and positive ion mode high-resolution ESI MS/MS spectrum for subarmigeride B (**2**) ( $m/z$  823.5078  $[M + H]^+$ )

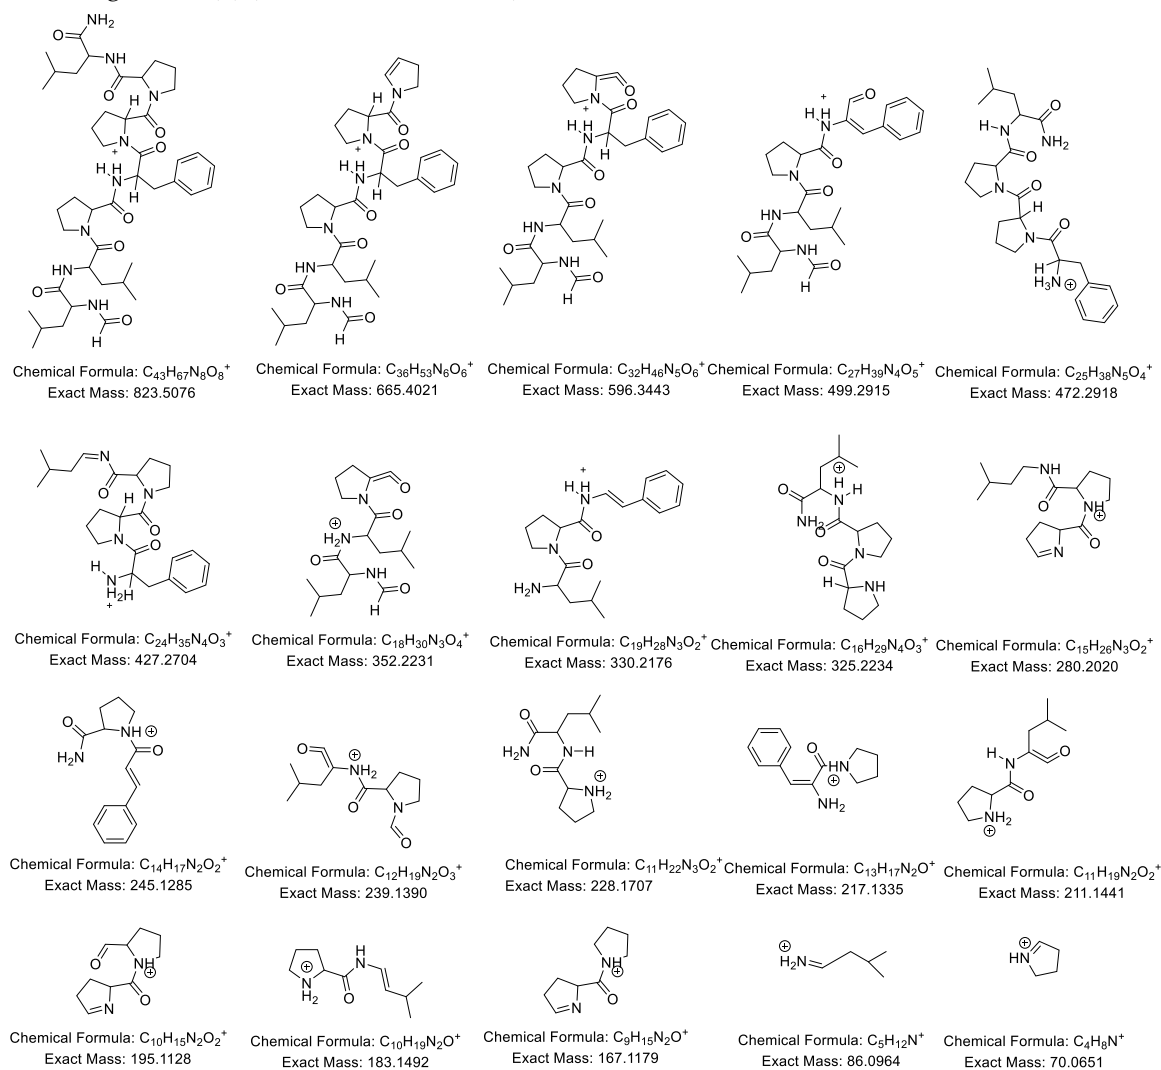

#### Acquisition Parameter

|             |            |                      |          |                  |           |
|-------------|------------|----------------------|----------|------------------|-----------|
| Source Type | ESI        | Ion Polarity         | Positive | Set Nebulizer    | 2.4 Bar   |
| Focus       | Not active | Set Capillary        | 3500 V   | Set Dry Heater   | 200 °C    |
| Scan Begin  | 50 m/z     | Set End Plate Offset | -500 V   | Set Dry Gas      | 8.0 l/min |
| Scan End    | 1300 m/z   | Set Charging Voltage | 2000 V   | Set Divert Valve | Waste     |
|             |            | Set Corona           | 0 nA     | Set APCI Heater  | 0 °C      |

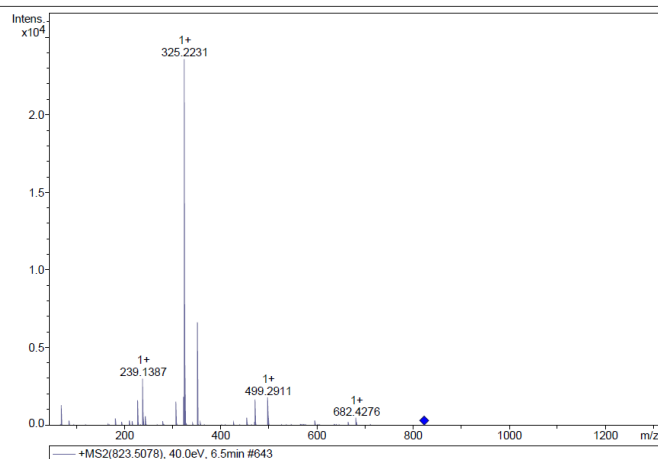

**Table S2:** Product ion spectra data for subarmigeride C (**3**) ( $m/z$  839.5024  $[M + H]^+$ )

| Product ion Assignment                                                        | ( $m/z$ ) | Error, pm | Molecular Formula                                             |
|-------------------------------------------------------------------------------|-----------|-----------|---------------------------------------------------------------|
| HOOC-Ile/Leu-Pro-Ile/Leu-Phe-Pro-Pro-Ile/Leu-NH <sub>2</sub> + H <sup>+</sup> | 839.5024  | 0.2       | C <sub>43</sub> H <sub>67</sub> N <sub>8</sub> O <sub>9</sub> |
| HOOC-Ile/Leu-Pro-Ile/Leu-Phe-Pro-Pro + H <sup>+</sup>                         | 681.3973  | -0.3      | C <sub>36</sub> H <sub>53</sub> N <sub>6</sub> O <sub>7</sub> |
| HOOC-Ile/Leu-Pro-Ile/Leu-Phe-Pro + H <sup>+</sup>                             | 612.3406  | -2.4      | C <sub>32</sub> H <sub>46</sub> N <sub>5</sub> O <sub>7</sub> |
| HOOC-Ile/Leu-Pro-Ile/Leu-Phe + H <sup>+</sup>                                 | 515.2860  | 0.8       | C <sub>27</sub> H <sub>39</sub> N <sub>4</sub> O <sub>6</sub> |
| HOOC-Ile/Leu-Pro-Ile/Leu-Phe + H <sup>+</sup>                                 | 487.2913  | 0.3       | C <sub>26</sub> H <sub>39</sub> N <sub>4</sub> O <sub>5</sub> |
| Phe-Pro-Pro-Ile/Leu-NH <sub>2</sub> + H <sup>+</sup>                          | 472.2920  | -0.4      | C <sub>25</sub> H <sub>38</sub> N <sub>5</sub> O <sub>4</sub> |
| Phe-Pro-Pro-Ile/Leu-NH <sub>2</sub> + H <sup>+</sup>                          | 455.2655  | -0.5      | C <sub>25</sub> H <sub>35</sub> N <sub>4</sub> O <sub>4</sub> |
| Phe-Pro-Pro-Ile/Leu + H <sup>+</sup>                                          | 427.2698  | 1.2       | C <sub>24</sub> H <sub>35</sub> N <sub>4</sub> O <sub>3</sub> |
| HOOC-Ile/Leu-Pro-Ile/Leu + H <sup>+</sup>                                     | 368.2178  | 0.6       | C <sub>18</sub> H <sub>30</sub> N <sub>3</sub> O <sub>5</sub> |
| HOOC-Ile/Leu-Pro-Ile/Leu + H <sup>+</sup>                                     | 340.2228  | 1         | C <sub>17</sub> H <sub>30</sub> N <sub>3</sub> O <sub>4</sub> |
| Pro-Pro-Ile/Leu-NH <sub>2</sub> + H <sup>+</sup>                              | 325.2231  | 0.8       | C <sub>16</sub> H <sub>29</sub> N <sub>4</sub> O <sub>3</sub> |
| Pro-Pro-Ile/Leu + H <sup>+</sup>                                              | 308.1964  | 1.4       | C <sub>16</sub> H <sub>26</sub> N <sub>3</sub> O <sub>3</sub> |
| Pro-Pro-Ile/Leu + H <sup>+</sup>                                              | 280.2017  | 1         | C <sub>15</sub> H <sub>26</sub> N <sub>3</sub> O <sub>2</sub> |
| HOOC-Ile/Leu-Pro + H <sup>+</sup>                                             | 255.1337  | 0.7       | C <sub>12</sub> H <sub>19</sub> N <sub>2</sub> O <sub>4</sub> |
| Phe-Pro + H <sup>+</sup>                                                      | 245.1281  | 1.6       | C <sub>14</sub> H <sub>17</sub> N <sub>2</sub> O <sub>2</sub> |
| Pro-Ile/Leu-NH <sub>2</sub> + H <sup>+</sup>                                  | 228.1703  | 1.7       | C <sub>11</sub> H <sub>22</sub> N <sub>3</sub> O <sub>2</sub> |
| Phe-Pro + H <sup>+</sup>                                                      | 217.1333  | 1.2       | C <sub>13</sub> H <sub>17</sub> N <sub>2</sub> O              |
| Pro-Ile/Leu + H <sup>+</sup>                                                  | 211.1433  | 3.6       | C <sub>11</sub> H <sub>19</sub> N <sub>2</sub> O <sub>2</sub> |
| Pro-Pro + H <sup>+</sup>                                                      | 195.1126  | 1         | C <sub>10</sub> H <sub>15</sub> N <sub>2</sub> O <sub>2</sub> |
| Pro-Ile/Leu + H <sup>+</sup>                                                  | 183.1489  | 1.8       | C <sub>10</sub> H <sub>19</sub> N <sub>2</sub> O              |
| Pro-Pro + H <sup>+</sup>                                                      | 167.1177  | 1.1       | C <sub>9</sub> H <sub>15</sub> N <sub>2</sub> O               |
| Ile/Leu immonium fragment + H <sup>+</sup>                                    | 86.0964   | 0.9       | C <sub>5</sub> H <sub>12</sub> N                              |
| Pro immonium fragment + H <sup>+</sup>                                        | 70.0648   | 4.1       | C <sub>4</sub> H <sub>8</sub> N                               |



**Figure S13:** Fragmentations pattern and positive ion mode high-resolution ESI MS/MS spectrum for subarmigeride C (3) ( $m/z$  839.5024 [M + H]<sup>+</sup>)

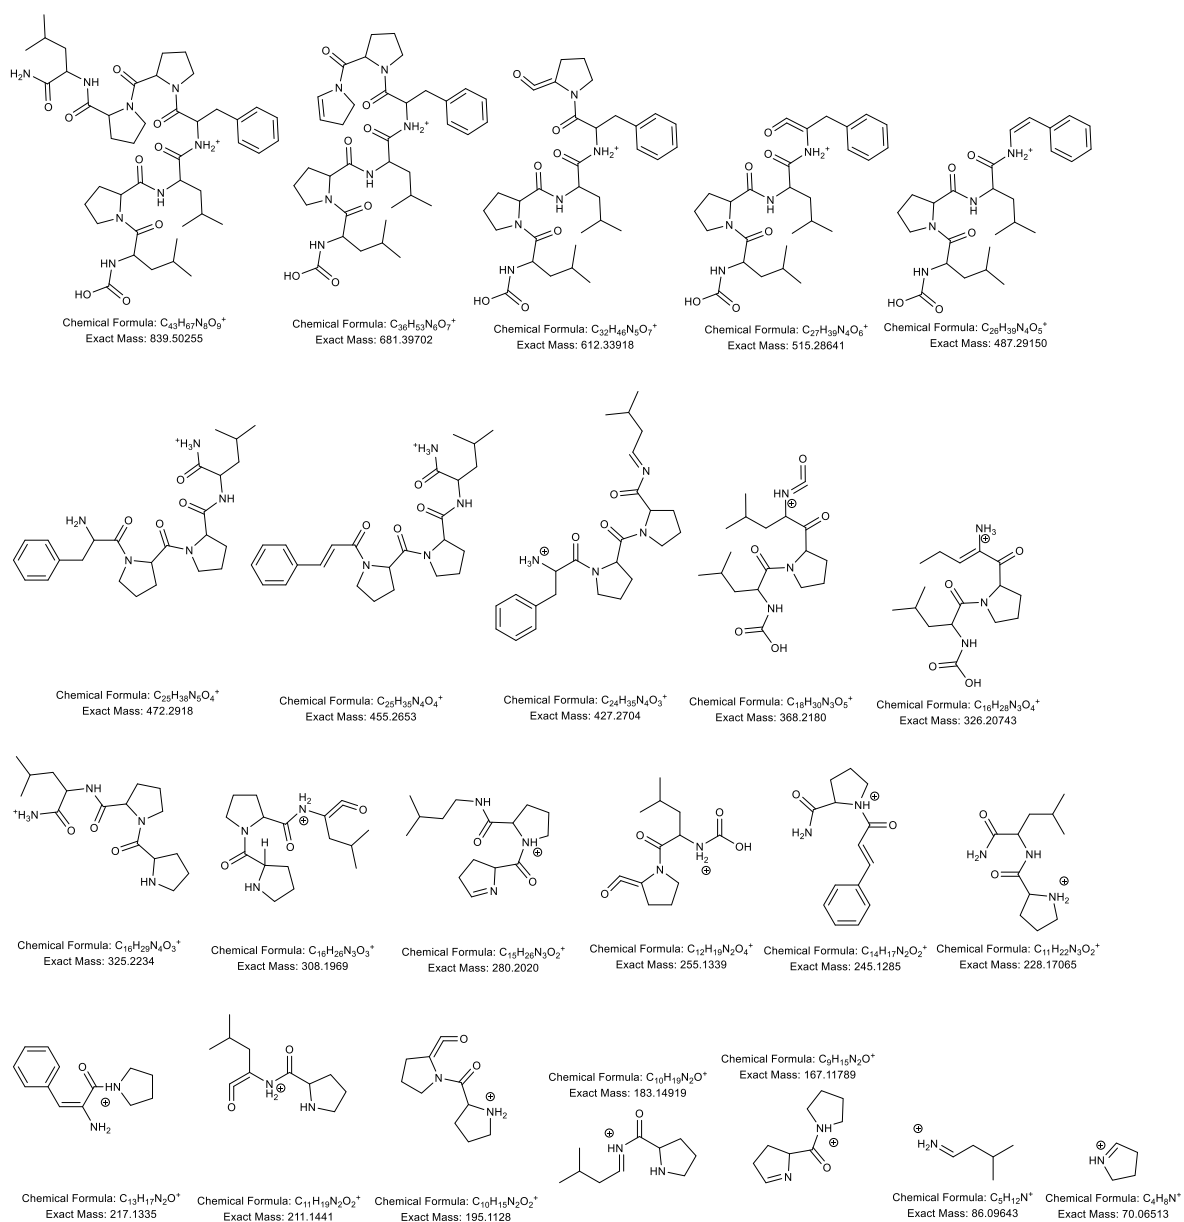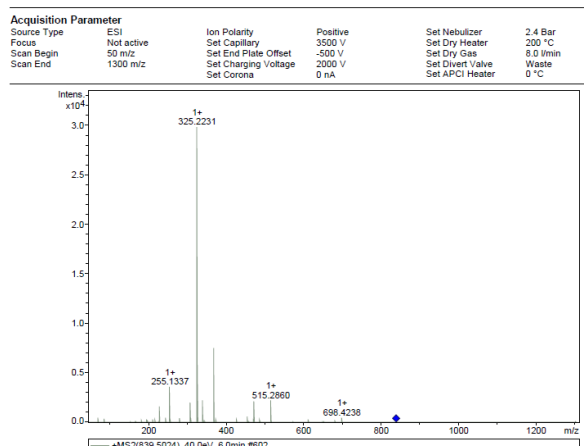

**Table S3:** Product ion spectra data for subarmigeride D (4) ( $m/z$  829.4962  $[M + H]^+$ )

| Product ion Assignment                                               | ( $m/z$ ) | Error, pm | Molecular Formula                                             |
|----------------------------------------------------------------------|-----------|-----------|---------------------------------------------------------------|
| Ile/Leu-Pro-Phe-Phe-Pro-Pro-Ile/Leu-NH <sub>2</sub> + H <sup>+</sup> | 829.4962  | -0.4      | C <sub>45</sub> H <sub>65</sub> N <sub>8</sub> O <sub>7</sub> |
| Pro-Phe-Phe-Pro-Pro-Ile/Leu-NH <sub>2</sub> + H <sup>+</sup>         | 716.4143  | -1.7      | C <sub>39</sub> H <sub>54</sub> N <sub>7</sub> O <sub>6</sub> |
| Pro-Phe-Phe-Pro-Pro-Ile/Leu + H <sup>+</sup>                         | 699.3865  | -0.1      | C <sub>39</sub> H <sub>51</sub> N <sub>6</sub> O <sub>6</sub> |
| Phe-Phe-Pro-Pro-Ile/Leu-NH <sub>2</sub> + H <sup>+</sup>             | 619.3591  | 1.8       | C <sub>35</sub> H <sub>54</sub> N <sub>7</sub> O <sub>6</sub> |
| Phe-Phe-Pro-Pro-Ile/Leu-NH <sub>2</sub> + H <sup>+</sup>             | 602.3342  | -0.9      | C <sub>34</sub> H <sub>47</sub> N <sub>6</sub> O <sub>5</sub> |
| Pro-Phe-Phe-Pro-Pro + H <sup>+</sup>                                 | 584.3227  | 0.7       | C <sub>34</sub> H <sub>44</sub> N <sub>5</sub> O <sub>5</sub> |
| Ile/Leu-Pro-Phe-Phe-Pro + H <sup>+</sup>                             | 574.3393  | -0.9      | C <sub>34</sub> H <sub>42</sub> N <sub>5</sub> O <sub>4</sub> |
| Ile/Leu-Pro-Phe-Phe + H <sup>+</sup>                                 | 505.2812  | -0.6      | C <sub>33</sub> H <sub>44</sub> N <sub>5</sub> O <sub>4</sub> |
| Phe-Phe-Pro-Pro + H <sup>+</sup>                                     | 489.2499  | -0.6      | C <sub>29</sub> H <sub>37</sub> N <sub>4</sub> O <sub>4</sub> |
| Ile/Leu-Pro-Phe-Phe + H <sup>+</sup>                                 | 477.2859  | 0.2       | C <sub>28</sub> H <sub>33</sub> N <sub>4</sub> O <sub>4</sub> |
| Ile/Leu-Pro-Phe + H <sup>+</sup>                                     | 472.2920  | -0.3      | C <sub>28</sub> H <sub>37</sub> N <sub>4</sub> O <sub>3</sub> |
| Phe-Pro-Pro-Ile/Leu + H <sup>+</sup>                                 | 455.2660  | -1.6      | C <sub>25</sub> H <sub>38</sub> N <sub>5</sub> O <sub>4</sub> |
| Phe-Phe-Pro + H <sup>+</sup>                                         | 392.1967  | 0.5       | C <sub>25</sub> H <sub>35</sub> N <sub>4</sub> O <sub>4</sub> |
| Ile/Leu-Pro-Phe + H <sup>+</sup>                                     | 358.2124  | 0.3       | C <sub>23</sub> H <sub>26</sub> N <sub>3</sub> O <sub>3</sub> |
| Pro-Pro-Ile/Leu-NH <sub>2</sub> + H <sup>+</sup>                     | 325.2230  | 1.2       | C <sub>20</sub> H <sub>28</sub> N <sub>3</sub> O <sub>3</sub> |
| Pro-Pro-Ile/Leu + H <sup>+</sup>                                     | 308.1968  | 0.4       | C <sub>16</sub> H <sub>29</sub> N <sub>4</sub> O <sub>3</sub> |
| Phe-Pro + H <sup>+</sup>                                             | 245.1281  | 1.6       | C <sub>16</sub> H <sub>26</sub> N <sub>3</sub> O <sub>3</sub> |
| Pro-Ile/Leu-NH <sub>2</sub> + H <sup>+</sup>                         | 228.1702  | 1.9       | C <sub>14</sub> H <sub>17</sub> N <sub>2</sub> O <sub>2</sub> |
| Phe-Pro + H <sup>+</sup>                                             | 217.1327  | 3.9       | C <sub>11</sub> H <sub>22</sub> N <sub>3</sub> O <sub>2</sub> |
| Pro-Ile/Leu + H <sup>+</sup>                                         | 211.1435  | 3.1       | C <sub>13</sub> H <sub>17</sub> N <sub>2</sub> O              |
| Phe immonium fragment + H <sup>+</sup>                               | 120.0809  | -0.7      | C <sub>9</sub> H <sub>17</sub> N <sub>2</sub> O               |
| Ile/Leu immonium fragment + H <sup>+</sup>                           | 86.0961   | 3.2       | C <sub>8</sub> H <sub>10</sub> N                              |
| Pro immonium fragment + H <sup>+</sup>                               | 70.0649   | 3.3       | C <sub>5</sub> H <sub>12</sub> N                              |

**Figure S14:** Fragmentations pattern and positive ion mode high-resolution ESI MS/MS spectrum for subarmigeride D (**4**) ( $m/z$  829.4962 [ $M + H$ ] $^+$ )

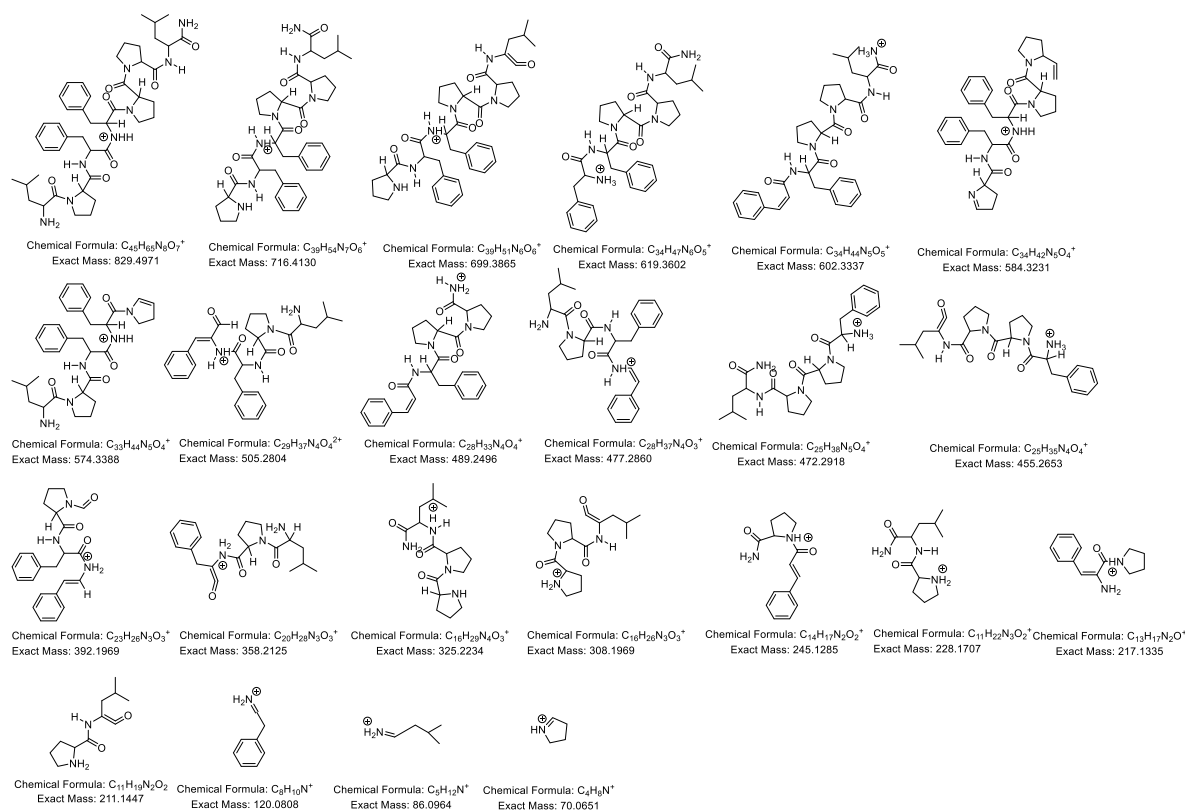

#### Acquisition Parameter

|             |            |                      |          |                  |           |
|-------------|------------|----------------------|----------|------------------|-----------|
| Source Type | ESI        | Ion Polarity         | Positive | Set Nebulizer    | 2.4 Bar   |
| Focus       | Not active | Set Capillary        | 3500 V   | Set Dry Heater   | 200 °C    |
| Scan Begin  | 50 m/z     | Set End Plate Offset | -500 V   | Set Dry Gas      | 8.0 l/min |
| Scan End    | 1300 m/z   | Set Charging Voltage | 2000 V   | Set Divert Valve | Waste     |
|             |            | Set Corona           | 0 nA     | Set APCI Heater  | 0 °C      |

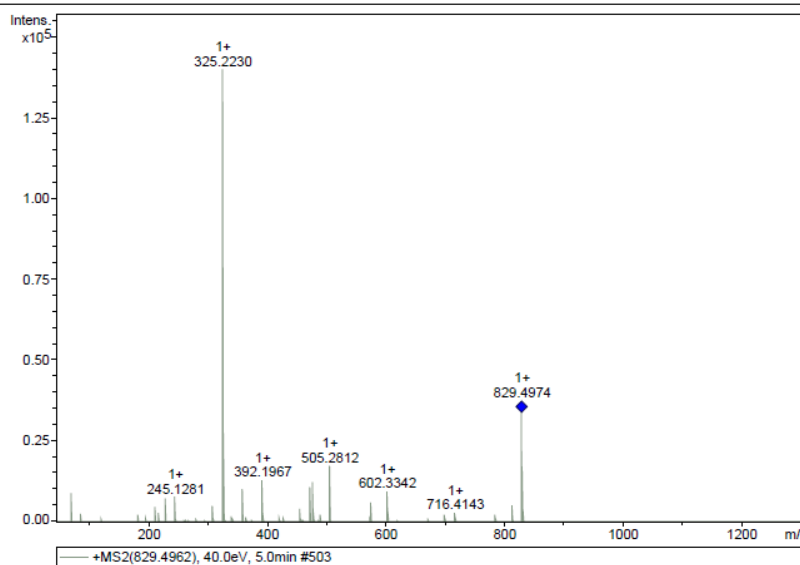

**Table S4:** Product ion spectra data for subarmigeride E (5) ( $m/z$  767.4807  $[M + H]^+$ )

| Product ion Assignment                                           | ( $m/z$ ) | Error, pm | Molecular Formula                                             |
|------------------------------------------------------------------|-----------|-----------|---------------------------------------------------------------|
| Val-Val-Pro-Phe-Pro-Pro-Ile/Leu-NH <sub>2</sub> + H <sup>+</sup> | 767.4807  | 0.9       | C <sub>40</sub> H <sub>63</sub> N <sub>8</sub> O <sub>7</sub> |
| Val-Val-Pro-Phe-Pro-Pro-Ile/Leu + H <sup>+</sup>                 | 750.4557  | -1.1      | C <sub>40</sub> H <sub>60</sub> N <sub>7</sub> O <sub>7</sub> |
| Val-Val-Pro-Phe-Pro-Pro-Ile/Leu + H <sup>+</sup>                 | 722.4602  | -0.3      | C <sub>39</sub> H <sub>60</sub> N <sub>7</sub> O <sub>6</sub> |
| Val-Pro-Phe-Pro-Pro-Ile/Leu-NH <sub>2</sub> + H <sup>+</sup>     | 668.4136  | -0.8      | C <sub>35</sub> H <sub>54</sub> N <sub>7</sub> O <sub>6</sub> |
| Val-Pro-Phe-Pro-Pro-Ile/Leu-NH <sub>2</sub> + H <sup>+</sup>     | 651.3864  | 0.1       | C <sub>35</sub> H <sub>51</sub> N <sub>6</sub> O <sub>6</sub> |
| Val-Val-Pro-Phe-Pro-Pro + H <sup>+</sup>                         | 637.3710  | -0.3      | C <sub>34</sub> H <sub>49</sub> N <sub>6</sub> O <sub>6</sub> |
| Val-Pro-Phe-Pro-Pro-Ile/Leu + H <sup>+</sup>                     | 623.3914  | 0.2       | C <sub>34</sub> H <sub>51</sub> N <sub>6</sub> O <sub>5</sub> |
| Val-Val-Pro-Phe-Pro-Pro + H <sup>+</sup>                         | 609.3763  | -0.7      | C <sub>33</sub> H <sub>49</sub> N <sub>6</sub> O <sub>5</sub> |
| Pro-Phe-Pro-Pro-Ile/Leu + H <sup>+</sup>                         | 554.3330  | 1.2       | C <sub>30</sub> H <sub>44</sub> N <sub>5</sub> O <sub>5</sub> |
| Val-Val-Pro-Phe-Pro + H <sup>+</sup>                             | 540.3182  | -0.4      | C <sub>29</sub> H <sub>42</sub> N <sub>5</sub> O <sub>5</sub> |
| Val-Val-Pro-Phe-Pro + H <sup>+</sup>                             | 512.3237  | -1.1      | C <sub>28</sub> H <sub>42</sub> N <sub>5</sub> O <sub>4</sub> |
| Phe-Pro-Pro-Ile/Leu-NH <sub>2</sub> + H <sup>+</sup>             | 472.2919  | -0.2      | C <sub>25</sub> H <sub>38</sub> N <sub>5</sub> O <sub>4</sub> |
| Phe-Pro-Pro-Ile/Leu + H <sup>+</sup>                             | 455.2652  | 0.2       | C <sub>25</sub> H <sub>35</sub> N <sub>4</sub> O <sub>4</sub> |
| Val-Val-Pro-Phe-Pro + H <sup>+</sup>                             | 443.2652  | 0.2       | C <sub>24</sub> H <sub>35</sub> N <sub>4</sub> O <sub>4</sub> |
| Phe-Pro-Pro-Ile/Leu + H <sup>+</sup>                             | 427.2699  | 1.1       | C <sub>24</sub> H <sub>35</sub> N <sub>4</sub> O <sub>3</sub> |
| Val-Val-Pro-Phe + H <sup>+</sup>                                 | 415.2706  | -0.5      | C <sub>23</sub> H <sub>35</sub> N <sub>4</sub> O <sub>3</sub> |
| Val-Pro-Phe-Pro + H <sup>+</sup>                                 | 398.2441  | -0.8      | C <sub>23</sub> H <sub>32</sub> N <sub>3</sub> O <sub>3</sub> |
| Phe-Pro-Pro + H <sup>+</sup>                                     | 344.1967  | 0.5       | C <sub>19</sub> H <sub>26</sub> N <sub>3</sub> O <sub>3</sub> |
| Phe-Pro-Pro + H <sup>+</sup>                                     | 342.1814  | -0.4      | C <sub>19</sub> H <sub>24</sub> N <sub>3</sub> O <sub>3</sub> |
| Pro-Pro-Ile/Leu + H <sup>+</sup>                                 | 325.2233  | 0.5       | C <sub>16</sub> H <sub>29</sub> N <sub>4</sub> O <sub>3</sub> |
| Phe-Pro-Pro + H <sup>+</sup>                                     | 316.2022  | -0.7      | C <sub>18</sub> H <sub>26</sub> N <sub>3</sub> O <sub>2</sub> |
| Pro-Pro-Ile/Leu + H <sup>+</sup>                                 | 308.1970  | -0.4      | C <sub>16</sub> H <sub>26</sub> N <sub>3</sub> O <sub>3</sub> |
| Phe-Pro-Pro + H <sup>+</sup>                                     | 299.1751  | 1.1       | C <sub>18</sub> H <sub>23</sub> N <sub>2</sub> O <sub>2</sub> |
| Val-Val-Pro + H <sup>+</sup>                                     | 296.1968  | 0.4       | C <sub>15</sub> H <sub>26</sub> N <sub>3</sub> O <sub>3</sub> |
| Val-Val-Pro + H <sup>+</sup>                                     | 294.1811  | 0.3       | C <sub>15</sub> H <sub>24</sub> N <sub>3</sub> O <sub>3</sub> |
| Pro-Pro-Ile/Leu + H <sup>+</sup>                                 | 280.2018  | 0.4       | C <sub>15</sub> H <sub>26</sub> N <sub>3</sub> O <sub>2</sub> |
| Pro-Pro-Ile/Leu + H <sup>+</sup>                                 | 278.1865  | -0.8      | C <sub>15</sub> H <sub>24</sub> N <sub>3</sub> O <sub>2</sub> |
| Val-Val-Pro + H <sup>+</sup>                                     | 268.2017  | 1         | C <sub>14</sub> H <sub>26</sub> N <sub>3</sub> O <sub>2</sub> |
| Phe-Pro + H <sup>+</sup>                                         | 245.1282  | 0.9       | C <sub>14</sub> H <sub>17</sub> N <sub>2</sub> O <sub>2</sub> |
| Pro-Ile/Leu-NH <sub>2</sub> + H <sup>+</sup>                     | 228.1702  | 1.8       | C <sub>11</sub> H <sub>22</sub> N <sub>3</sub> O <sub>2</sub> |
| Phe-Pro + H <sup>+</sup>                                         | 219.1491  | 0.6       | C <sub>13</sub> H <sub>19</sub> N <sub>2</sub> O              |
| Phe-Pro + H <sup>+</sup>                                         | 217.1332  | 1.4       | C <sub>13</sub> H <sub>17</sub> N <sub>2</sub> O              |

|                                            |          |      |                                                               |
|--------------------------------------------|----------|------|---------------------------------------------------------------|
| Val-Val + H <sup>+</sup>                   | 214.1550 | -0.2 | C <sub>10</sub> H <sub>20</sub> N <sub>3</sub> O <sub>2</sub> |
| Pro-Ile/Leu + H <sup>+</sup>               | 211.1437 | 1.9  | C <sub>11</sub> H <sub>19</sub> N <sub>2</sub> O <sub>2</sub> |
| Val-Pro + H <sup>+</sup>                   | 197.1279 | 3    | C <sub>10</sub> H <sub>17</sub> N <sub>2</sub> O <sub>2</sub> |
| Pro-Pro + H <sup>+</sup>                   | 195.1122 | 3    | C <sub>10</sub> H <sub>15</sub> N <sub>2</sub> O <sub>2</sub> |
| Pro-Ile/Leu + H <sup>+</sup>               | 183.1486 | 3.1  | C <sub>10</sub> H <sub>19</sub> N <sub>2</sub> O              |
| Val-Pro + H <sup>+</sup>                   | 169.1331 | 2.6  | C <sub>9</sub> H <sub>17</sub> N <sub>2</sub> O               |
| Pro-Pro + H <sup>+</sup>                   | 167.1172 | 4    | C <sub>9</sub> H <sub>15</sub> N <sub>2</sub> O               |
| Val fragment + H <sup>+</sup>              | 126.0550 | -0.1 | C <sub>6</sub> H <sub>8</sub> NO <sub>2</sub>                 |
| Phe immonium fragment + H <sup>+</sup>     | 120.0813 | -4.5 | C <sub>8</sub> H <sub>10</sub> N                              |
| Val fragment + H <sup>+</sup>              | 98.0598  | 2.5  | C <sub>5</sub> H <sub>8</sub> NO                              |
| Ile/Leu immonium fragment + H <sup>+</sup> | 86.0962  | 2.4  | C <sub>5</sub> H <sub>12</sub> N                              |
| Val immonium fragment + H <sup>+</sup>     | 72.0804  | 5.6  | C <sub>4</sub> H <sub>10</sub> N                              |
| Pro immonium fragment + H <sup>+</sup>     | 70.0647  | 6    | C <sub>4</sub> H <sub>8</sub> N                               |



**Figure S15:** Fragmentations pattern and positive ion mode high-resolution ESI MS/MS spectrum for subarmigeride E (5) ( $m/z$  767.4807 [ $M + H$ ] $^+$ )

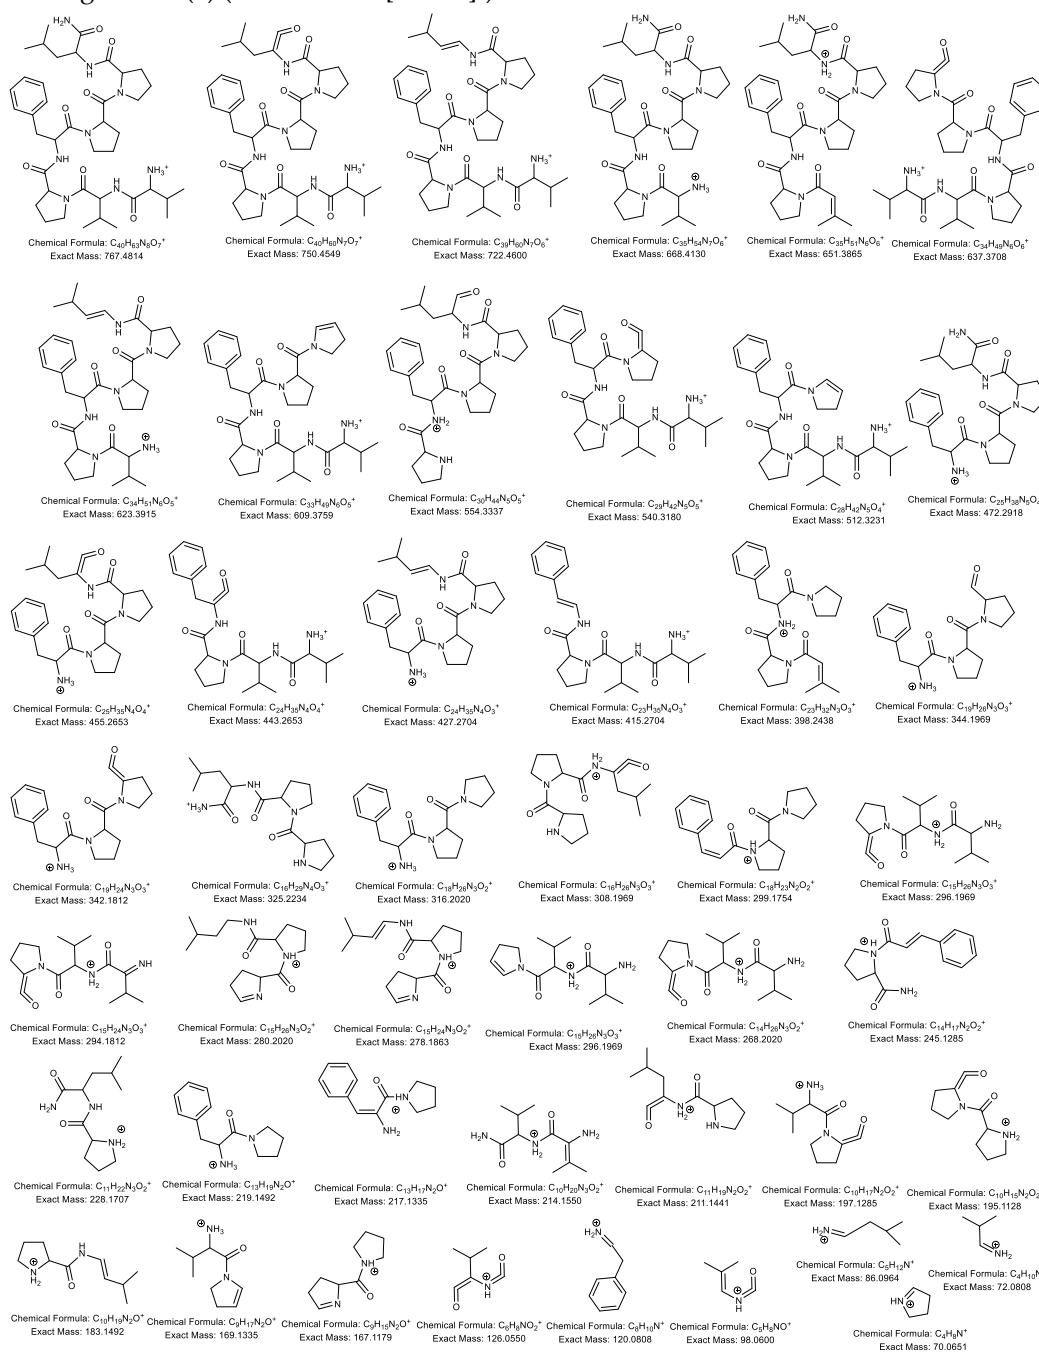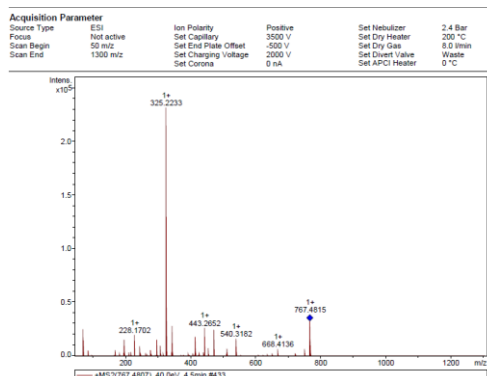

**Table S5:** Product ion spectra data for subarmigeride F (6) ( $m/z$  768.4650  $[M + H]^+$ )

| Product ion Assignment                  | ( $m/z$ ) | Error, pm | Molecular Formula    |
|-----------------------------------------|-----------|-----------|----------------------|
| Val-Val-Pro-Phe-Pro-Pro-Ile/Leu $H^+$   | 768.4649  | 0.7       | $C_{40}H_{62}N_7O_8$ |
| Val-Val-Pro-Phe-Pro-Pro-Ile/Leu + $H^+$ | 750.4536  | 1.7       | $C_{40}H_{60}N_7O_7$ |
| Val-Pro-Phe-Pro-Pro-Ile/Leu + $H^+$     | 669.3976  | -0.9      | $C_{35}H_{53}N_6O_7$ |
| Val-Val-Pro-Phe-Pro-Pro + $H^+$         | 637.3698  | 1.6       | $C_{34}H_{49}N_6O_6$ |
| Val-Val-Pro-Phe-Pro-Pro + $H^+$         | 609.3779  | -3.2      | $C_{33}H_{49}N_6O_5$ |
| Val-Val-Pro-Phe-Pro + $H^+$             | 540.3176  | 0.7       | $C_{29}H_{42}N_5O_5$ |
| Val-Val-Pro-Phe-Pro + $H^+$             | 512.3231  | 0.1       | $C_{28}H_{42}N_5O_4$ |
| Phe-Pro-Pro-Ile/Leu + $H^+$             | 473.2756  | 0.4       | $C_{25}H_{37}N_4O_5$ |
| Val-Val-Pro-Phe + $H^+$                 | 443.2655  | -0.5      | $C_{24}H_{35}N_4O_4$ |
| Val-Val-Pro-Phe + $H^+$                 | 415.2704  | 0         | $C_{23}H_{35}N_4O_3$ |
| Val-Val-Pro-Phe + $H^+$                 | 413.2543  | 0.9       | $C_{23}H_{33}N_4O_3$ |
| Phe-Pro-Pro + $H^+$                     | 372.1927  | -2.6      | $C_{20}H_{26}N_3O_4$ |
| Phe-Pro-Pro + $H^+$                     | 344.1965  | -2.7      | $C_{17}H_{24}N_6O_2$ |
| Phe-Pro-Pro + $H^+$                     | 342.1808  | -2.6      | $C_{17}H_{22}N_6O_2$ |
| Phe-Pro-Pro + $H^+$                     | 327.1707  | -1.3      | $C_{19}H_{23}N_2O_3$ |
| Pro-Pro-Ile/Leu + $H^+$                 | 326.2072  | 0.8       | $C_{16}H_{28}N_3O_4$ |
| Phe-Pro-Pro + $H^+$                     | 316.2017  | -3.5      | $C_{16}H_{24}N_6O$   |
| Pro-Pro-Ile/Leu + $H^+$                 | 308.1957  | 3.9       | $C_{16}H_{26}N_3O_3$ |
| Phe-Pro-Pro + $H^+$                     | 299.1739  | 4.9       | $C_{18}H_{23}N_2O_2$ |
| Val-Val-Pro + $H^+$                     | 296.1965  | 1.2       | $C_{15}H_{26}N_3O_3$ |
| Pro-Pro-Ile/Leu + $H^+$                 | 278.1857  | 2         | $C_{15}H_{24}N_3O_2$ |
| Val-Val-Pro + $H^+$                     | 268.2021  | -0.5      | $C_{14}H_{26}N_3O_2$ |
| Phe-Pro + $H^+$                         | 245.1282  | 0.8       | $C_{14}H_{17}N_2O_2$ |
| Pro-Ile/Leu + $H^+$                     | 229.1542  | 2         | $C_{11}H_{21}N_2O_3$ |
| Phe-Pro + $H^+$                         | 219.1488  | 1.6       | $C_{13}H_{19}N_2O$   |
| Phe-Pro + $H^+$                         | 217.1328  | 3.5       | $C_{13}H_{17}N_2O$   |
| Val-Pro + $H^+$                         | 197.1277  | 3.6       | $C_{10}H_{17}N_2O_2$ |
| Pro-Pro + $H^+$                         | 195.1120  | -3        | $C_8H_{13}N_5O$      |
| Val-Pro + $H^+$                         | 169.1329  | 3.9       | $C_9H_{17}N_2O$      |
| Ile/Leu immonium fragment + $H^+$       | 86.0956   | 10        | $C_5H_{12}N$         |
| Val immonium fragment + $H^+$           | 72.0803   | 6.2       | $C_4H_{10}N$         |
| Pro immonium fragment + $H^+$           | 70.0649   | 3.9       | $C_4H_8N$            |

**Figure S16:** Fragmentations pattern and positive ion mode high-resolution ESI MS/MS spectrum for subarmigeride F (6) ( $m/z$  768.4650  $[M + H]^+$ )

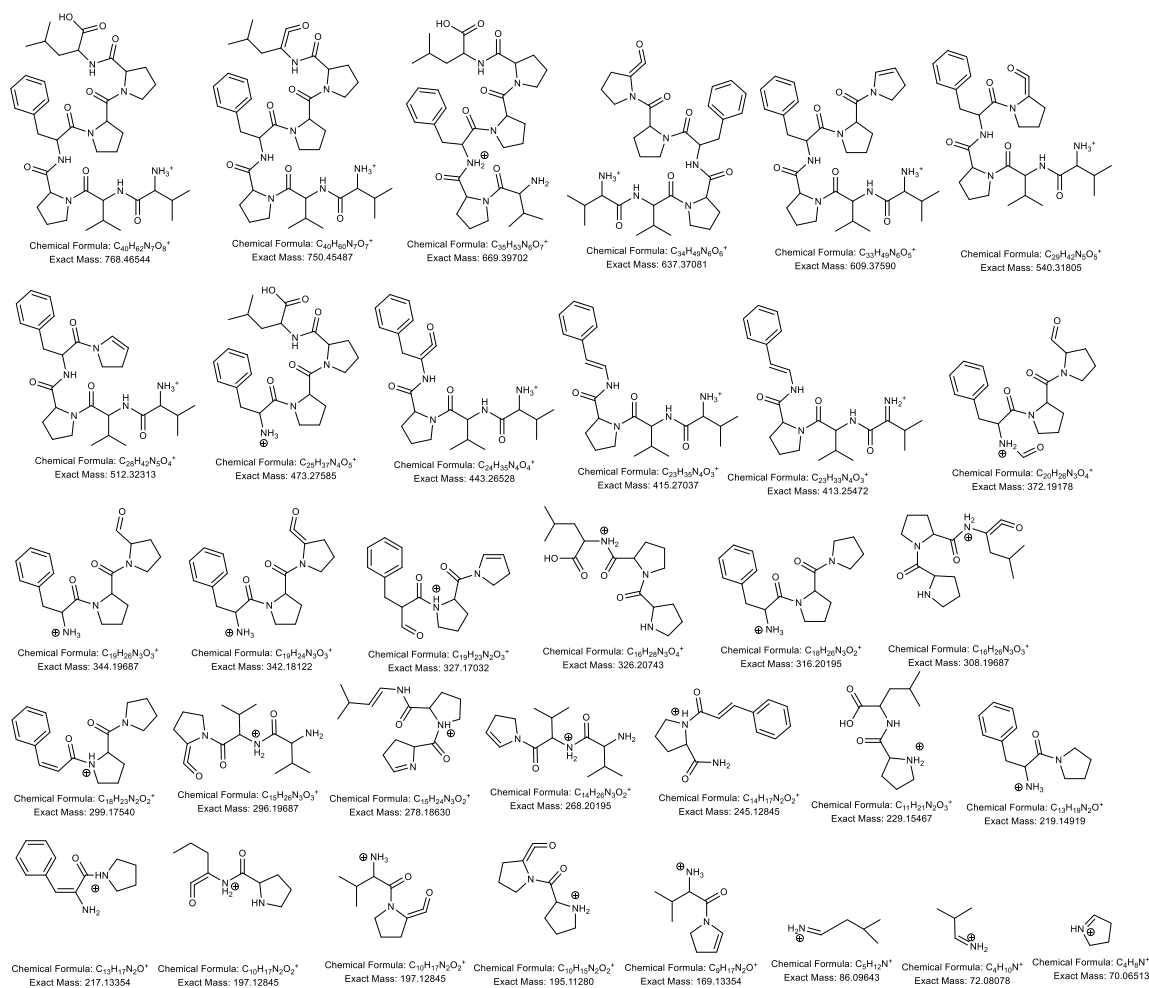

#### Acquisition Parameter

|             |            |                      |          |                  |           |
|-------------|------------|----------------------|----------|------------------|-----------|
| Source Type | ESI        | Ion Polarity         | Positive | Set Nebulizer    | 2.4 Bar   |
| Focus       | Not active | Set Capillary        | 3500 V   | Set Dry Heater   | 200 °C    |
| Scan Begin  | 50 m/z     | Set End Plate Offset | -500 V   | Set Dry Gas      | 8.0 l/min |
| Scan End    | 1300 m/z   | Set Charging Voltage | 2000 V   | Set Divert Valve | Waste     |
|             |            | Set Corona           | 0 nA     | Set APCI Heater  | 0 °C      |

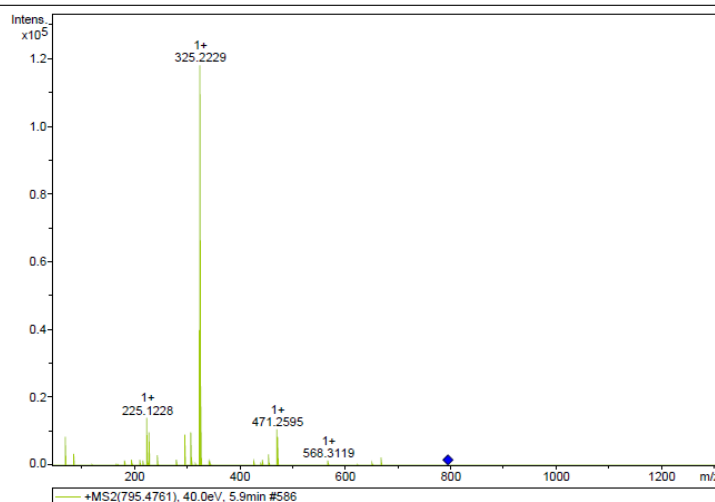

**Table S6:** Product ion spectra data for subarmigeride G (7) ( $m/z$  938.5698  $[M + H]^+$ )

| Product ion Assignment                                                            | ( $m/z$ ) | Error, pm | Molecular Formula                                              |
|-----------------------------------------------------------------------------------|-----------|-----------|----------------------------------------------------------------|
| COOH-Pro-Val-Ile/Leu-Ile/Leu-Phe-Pro-Pro-Ile/Leu-NH <sub>2</sub> + H <sup>+</sup> | 938.5698  | 1.2       | C <sub>48</sub> H <sub>76</sub> N <sub>9</sub> O <sub>10</sub> |
| Pro-Val-Ile/Leu-Ile/Leu-Phe-Pro-Pro-Ile/Leu-NH <sub>2</sub> + H <sup>+</sup>      | 797.4908  | 1.5       | C <sub>41</sub> H <sub>65</sub> N <sub>8</sub> O <sub>8</sub>  |
| COOH-Pro-Val-Ile/Leu-Ile/Leu-Phe-Pro + H <sup>+</sup>                             | 711.4090  | -1.9      | C <sub>37</sub> H <sub>55</sub> N <sub>6</sub> O <sub>8</sub>  |
| Pro-Val-Ile/Leu-Ile/Leu-Phe-NH <sub>2</sub> + H <sup>+</sup>                      | 585.3761  | -0.3      | C <sub>31</sub> H <sub>49</sub> N <sub>6</sub> O <sub>5</sub>  |
| Phe-Pro-Pro-Ile/Leu-NH <sub>2</sub> + H <sup>+</sup>                              | 472.2919  | 0         | C <sub>25</sub> H <sub>38</sub> N <sub>5</sub> O <sub>4</sub>  |
| COOH-Pro-Val-Ile/Leu-Ile/Leu + H <sup>+</sup>                                     | 467.2863  | 0.2       | C <sub>23</sub> H <sub>39</sub> N <sub>4</sub> O <sub>6</sub>  |
| Phe-Pro-Pro-Ile/Leu-NH <sub>2</sub> + H <sup>+</sup>                              | 455.2647  | 1.2       | C <sub>25</sub> H <sub>35</sub> N <sub>4</sub> O <sub>4</sub>  |
| COOH-Pro-Val-Ile/Leu-Ile/Leu + H <sup>+</sup>                                     | 439.2915  | -0.1      | C <sub>22</sub> H <sub>39</sub> N <sub>4</sub> O <sub>5</sub>  |
| Phe-Pro-Pro-Ile/Leu + H <sup>+</sup>                                              | 427.2698  | 1.4       | C <sub>24</sub> H <sub>35</sub> N <sub>4</sub> O <sub>3</sub>  |
| COOH-Pro-Val-Ile/Leu + H <sup>+</sup>                                             | 354.2021  | 0.6       | C <sub>17</sub> H <sub>28</sub> N <sub>3</sub> O <sub>5</sub>  |
| Phe-Pro-Pro + H <sup>+</sup>                                                      | 342.1804  | 2.5       | C <sub>19</sub> H <sub>24</sub> N <sub>3</sub> O <sub>3</sub>  |
| Pro-Pro-Ile/Leu + H <sup>+</sup>                                                  | 325.2231  | 0.9       | C <sub>16</sub> H <sub>29</sub> N <sub>4</sub> O <sub>3</sub>  |
| Pro-Pro-Ile/Leu + H <sup>+</sup>                                                  | 308.1966  | 0.9       | C <sub>16</sub> H <sub>26</sub> N <sub>3</sub> O <sub>3</sub>  |
| Pro-Pro-Ile/Leu + H <sup>+</sup>                                                  | 280.2016  | 1.3       | C <sub>15</sub> H <sub>26</sub> N <sub>3</sub> O <sub>2</sub>  |
| Pro-Ile/Leu + H <sup>+</sup>                                                      | 255.1335  | 1.8       | C <sub>12</sub> H <sub>19</sub> N <sub>2</sub> O <sub>4</sub>  |
| Phe-Pro + H <sup>+</sup>                                                          | 245.1281  | 1.6       | C <sub>14</sub> H <sub>17</sub> N <sub>2</sub> O <sub>2</sub>  |
| Pro-Ile/Leu-NH <sub>2</sub> + H <sup>+</sup>                                      | 228.1706  | 0.4       | C <sub>11</sub> H <sub>22</sub> N <sub>3</sub> O <sub>2</sub>  |
| Pro-Ile/Leu + H <sup>+</sup>                                                      | 217.1336  | -0.3      | C <sub>13</sub> H <sub>17</sub> N <sub>2</sub> O               |
| Pro-Ile/Leu + H <sup>+</sup>                                                      | 211.1434  | 3.3       | C <sub>11</sub> H <sub>19</sub> N <sub>2</sub> O <sub>2</sub>  |
| Pro-Pro + H <sup>+</sup>                                                          | 195.1111  | 8.6       | C <sub>10</sub> H <sub>15</sub> N <sub>2</sub> O <sub>2</sub>  |
| Pro-Ile/Leu + H <sup>+</sup>                                                      | 183.1485  | 3.9       | C <sub>10</sub> H <sub>19</sub> N <sub>2</sub> O               |
| Ile/Leu immonium fragment + H <sup>+</sup>                                        | 86.0958   | 7.3       | C <sub>5</sub> H <sub>12</sub> N                               |
| Pro immonium fragment + H <sup>+</sup>                                            | 70.0645   | 9.5       | C <sub>4</sub> H <sub>8</sub> N                                |

**Figure S17:** Fragmentations pattern and positive ion mode high-resolution ESI MS/MS spectrum for subarmigeride G (7) ( $m/z$  938.5698 [ $M + H$ ] $^+$ )

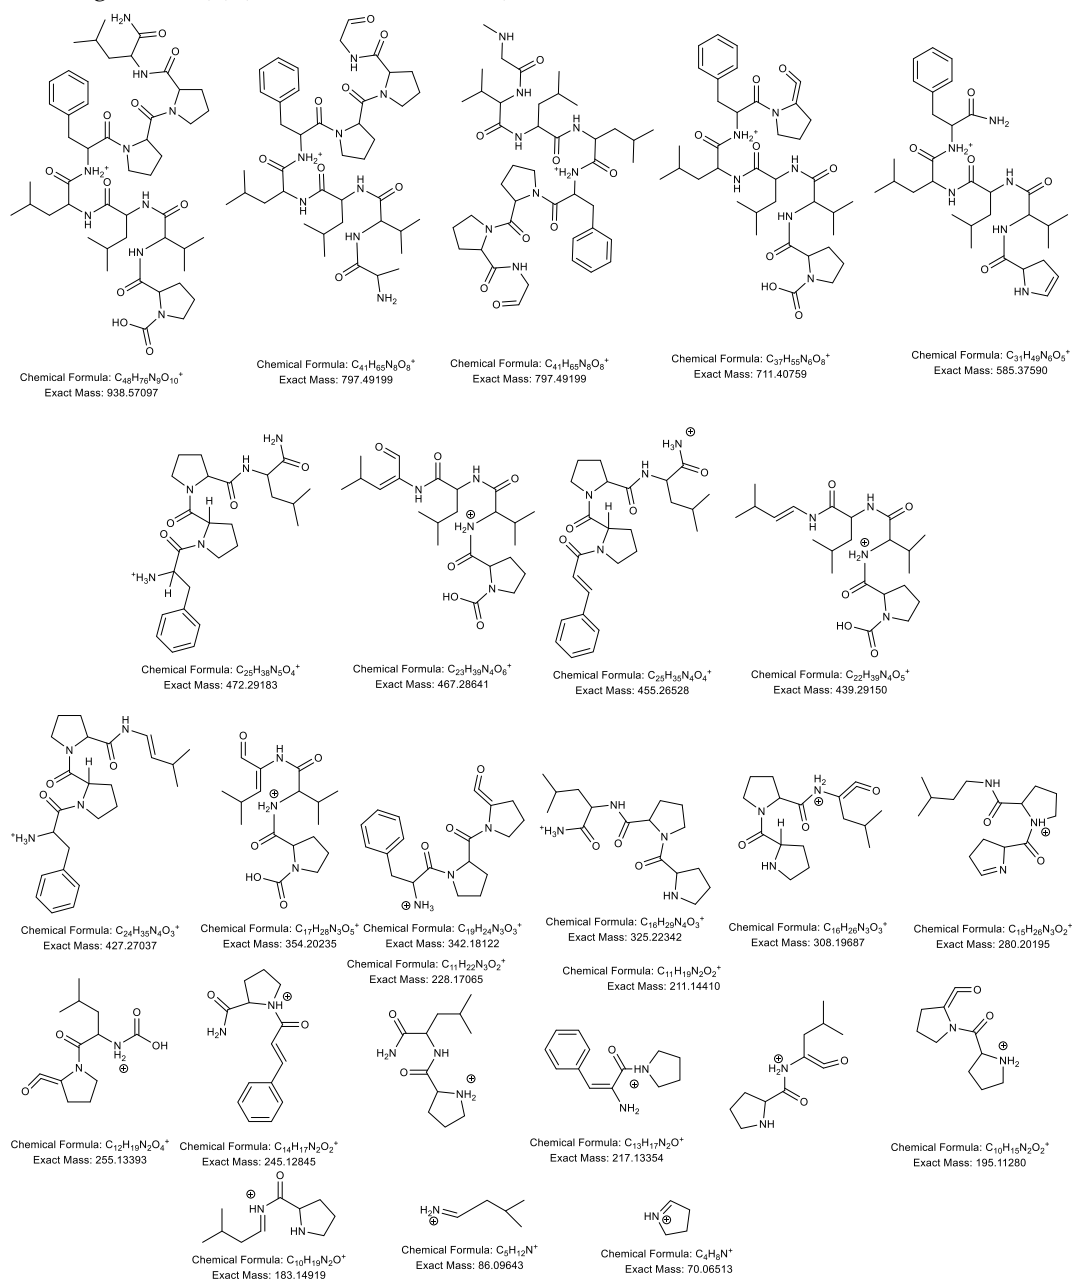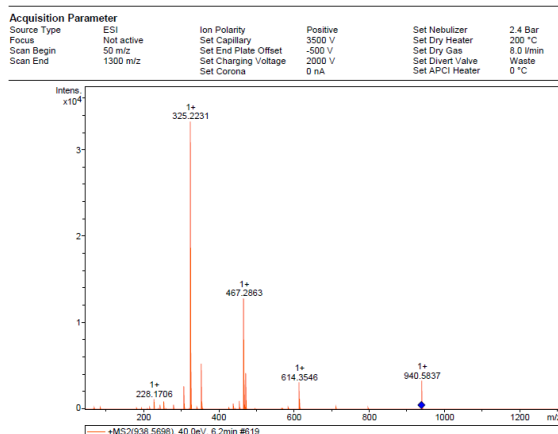



**Table S7:** Product ion spectra data for subarmigeride H (8) ( $m/z$  795.4763  $[M + H]^+$ )

| Product ion Assignment                                               | ( $m/z$ ) | Error, pm | Molecular Formula                                             |
|----------------------------------------------------------------------|-----------|-----------|---------------------------------------------------------------|
| CHO-Val-Val-Pro-Phe-Pro-Pro-Ile/Leu-NH <sub>2</sub> + H <sup>+</sup> | 795.4761  | 0.3       | C <sub>41</sub> H <sub>63</sub> N <sub>8</sub> O <sub>8</sub> |
| Val-Val-Pro-Phe-Pro-Pro-Ile/Leu-NH <sub>2</sub> + H <sup>+</sup>     | 668.4117  | 1.9       | C <sub>35</sub> H <sub>54</sub> N <sub>7</sub> O <sub>6</sub> |
| Val-Pro-Phe-Pro-Pro-Ile/Leu + H <sup>+</sup>                         | 623.3907  | 1.3       | C <sub>34</sub> H <sub>51</sub> N <sub>6</sub> O <sub>5</sub> |
| Phe-Pro-Pro-Ile/Leu-NH <sub>2</sub> + H <sup>+</sup>                 | 472.2911  | 1.5       | C <sub>25</sub> H <sub>38</sub> N <sub>5</sub> O <sub>4</sub> |
| Val-Val-Pro-Phe + H <sup>+</sup>                                     | 471.2595  | 1.4       | C <sub>25</sub> H <sub>35</sub> N <sub>4</sub> O <sub>5</sub> |
| Phe-Pro-Pro-Ile/Leu + H <sup>+</sup>                                 | 455.2648  | 1.1       | C <sub>25</sub> H <sub>35</sub> N <sub>4</sub> O <sub>4</sub> |
| CHO-Val-Val-Pro-Phe + H <sup>+</sup>                                 | 443.2644  | 1.9       | C <sub>24</sub> H <sub>35</sub> N <sub>4</sub> O <sub>4</sub> |
| Phe-Pro-Pro + H <sup>+</sup>                                         | 344.1961  | 2.1       | C <sub>19</sub> H <sub>26</sub> N <sub>3</sub> O <sub>3</sub> |
| Phe-Pro-Pro + H <sup>+</sup>                                         | 327.1704  | -0.3      | C <sub>19</sub> H <sub>23</sub> N <sub>2</sub> O <sub>3</sub> |
| Pro-Pro-Ile/Leu-NH <sub>2</sub> + H <sup>+</sup>                     | 325.2229  | 1.6       | C <sub>16</sub> H <sub>29</sub> N <sub>4</sub> O <sub>3</sub> |
| CHO-Val-Val-Pro + H <sup>+</sup>                                     | 324.1913  | 1.5       | C <sub>16</sub> H <sub>26</sub> N <sub>3</sub> O <sub>4</sub> |
| Phe-Pro-Pro + H <sup>+</sup>                                         | 316.2017  | 0.8       | C <sub>18</sub> H <sub>26</sub> N <sub>3</sub> O <sub>2</sub> |
| Pro-Pro-Ile/Leu + H <sup>+</sup>                                     | 308.1964  | 1.5       | C <sub>16</sub> H <sub>26</sub> N <sub>3</sub> O <sub>3</sub> |
| Val-Val-Pro + H <sup>+</sup>                                         | 296.1964  | 1.5       | C <sub>15</sub> H <sub>26</sub> N <sub>3</sub> O <sub>3</sub> |
| Phe-Pro + H <sup>+</sup>                                             | 245.1278  | 2.5       | C <sub>14</sub> H <sub>17</sub> N <sub>2</sub> O <sub>2</sub> |
| Pro-Ile/Leu-NH <sub>2</sub> + H <sup>+</sup>                         | 228.1701  | 2.3       | C <sub>11</sub> H <sub>22</sub> N <sub>3</sub> O <sub>2</sub> |
| Val-Val + H <sup>+</sup>                                             | 225.1228  | 2.3       | C <sub>11</sub> H <sub>17</sub> N <sub>2</sub> O <sub>3</sub> |
| Pro-Phe + H <sup>+</sup>                                             | 217.1329  | 2.8       | C <sub>13</sub> H <sub>17</sub> N <sub>2</sub> O              |
| Pro-Ile/Leu + H <sup>+</sup>                                         | 211.1433  | 4         | C <sub>11</sub> H <sub>19</sub> N <sub>2</sub> O <sub>2</sub> |
| Val-Pro + H <sup>+</sup>                                             | 197.1274  | 5.6       | C <sub>10</sub> H <sub>17</sub> N <sub>2</sub> O <sub>2</sub> |
| Pro-Ile/Leu + H <sup>+</sup>                                         | 183.1479  | 6.9       | C <sub>10</sub> H <sub>19</sub> N <sub>2</sub> O              |
| Val-Pro + H <sup>+</sup>                                             | 169.1330  | 3.5       | C <sub>9</sub> H <sub>17</sub> N <sub>2</sub> O               |
| Phe immonium fragment + H <sup>+</sup>                               | 120.0814  | -5        | C <sub>8</sub> H <sub>10</sub> N                              |
| Ile/Leu immonium fragment + H <sup>+</sup>                           | 86.0962   | 3.1       | C <sub>5</sub> H <sub>12</sub> N                              |
| Pro immonium fragment + H <sup>+</sup>                               | 70.0647   | 5.9       | C <sub>4</sub> H <sub>8</sub> N                               |

**Figure S18:** Fragmentations pattern and positive ion mode high-resolution ESI MS/MS spectrum for subarmigeride H (**8**) ( $m/z$  795.4763 [ $M + H$ ]<sup>+</sup>)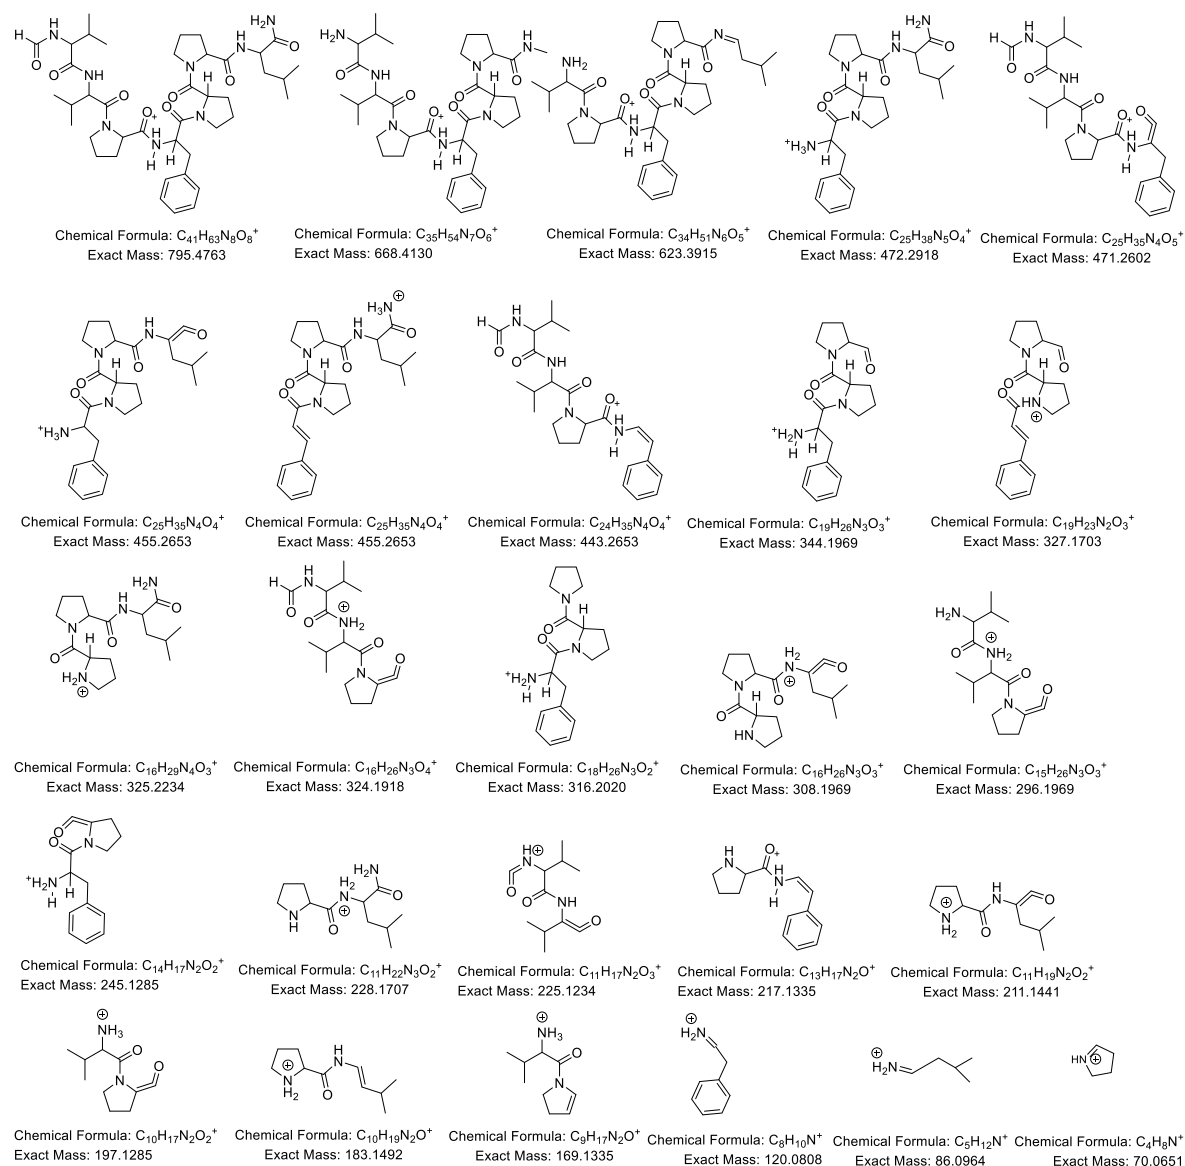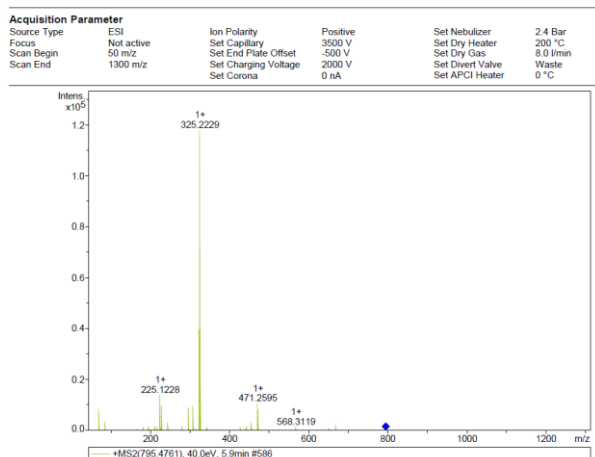

**Figure S19:** Comparison of MS/MS spectra of the feature  $m/z$  857.4920 at 6.036 min in the cyanobacterial strain PMC 1052.18 (*Spirulina* sp.) from a mangrove in Guadeloupe (A) and the feature  $m/z$  857.4909 at 5.934 min in the marine sponge *C. subarmigera* (B). Comparison of extracted ion chromatograms for  $m/z$  857.4912 (tolerance 10 ppm) from the crude extracts of the cyanobacterial strain PMC 1052.18 (C) and the marine sponge *C. subarmigera* (D).

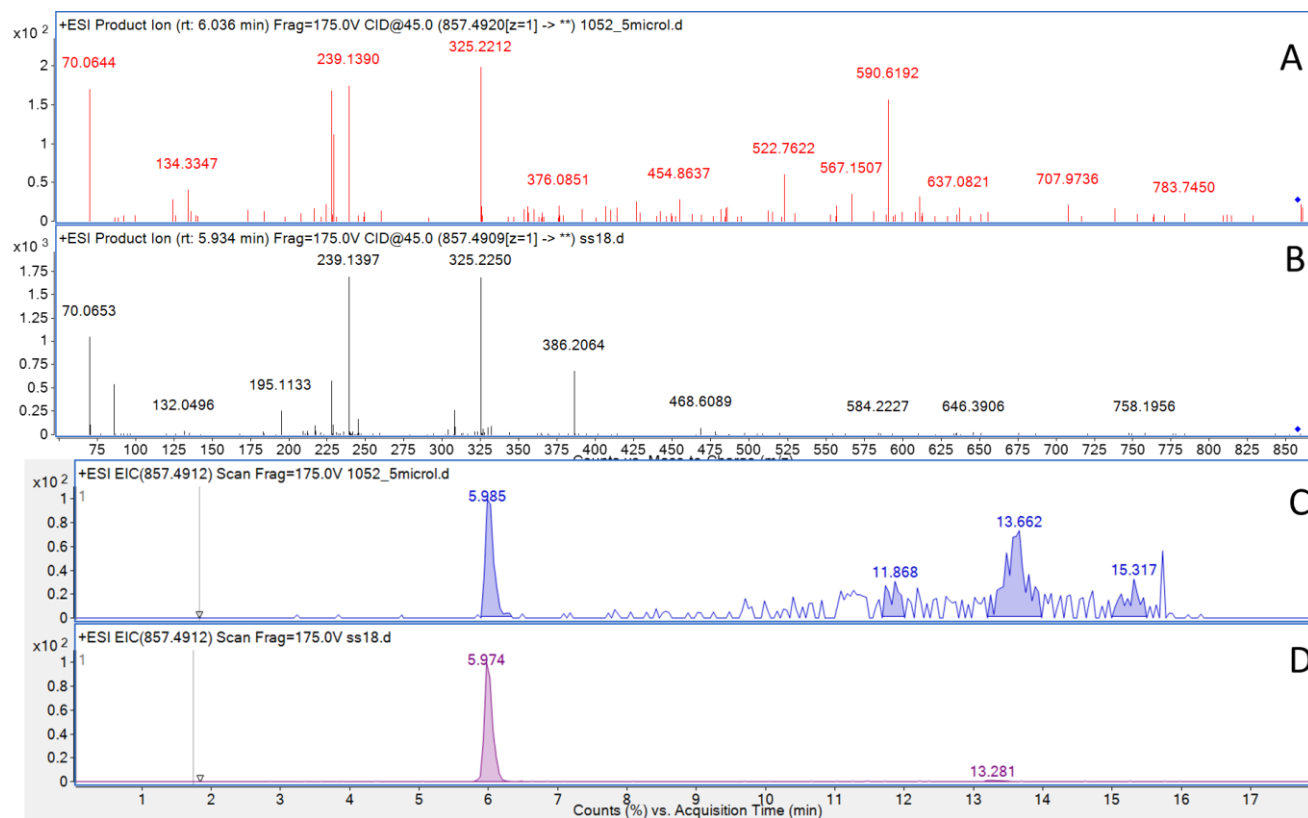

**Figure S20:** Helically coiled morphology of *Spirulina* sp. PMC 1052.18.

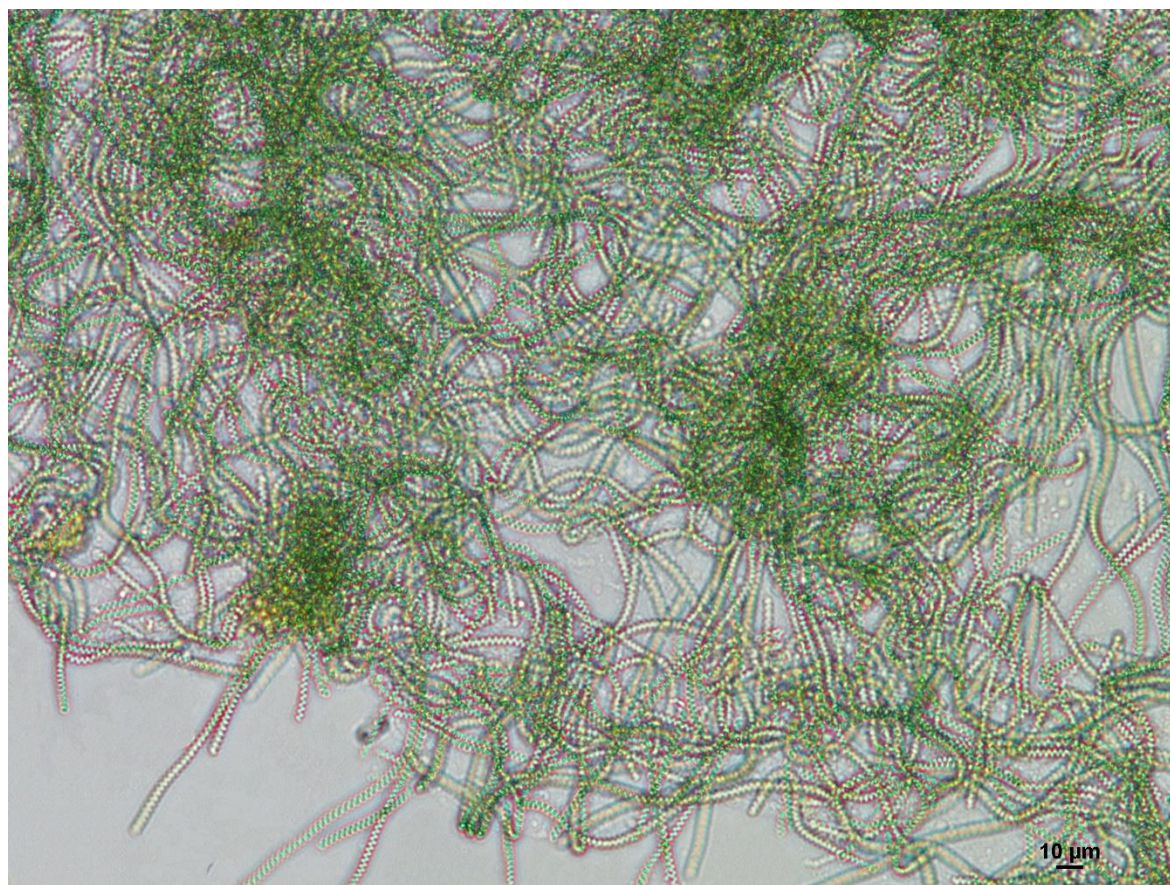

(<https://gnps.ucsd.edu/ProteoSAFe/status.jsp?task=8a40068370b44e21855c1e14647ff23a>)

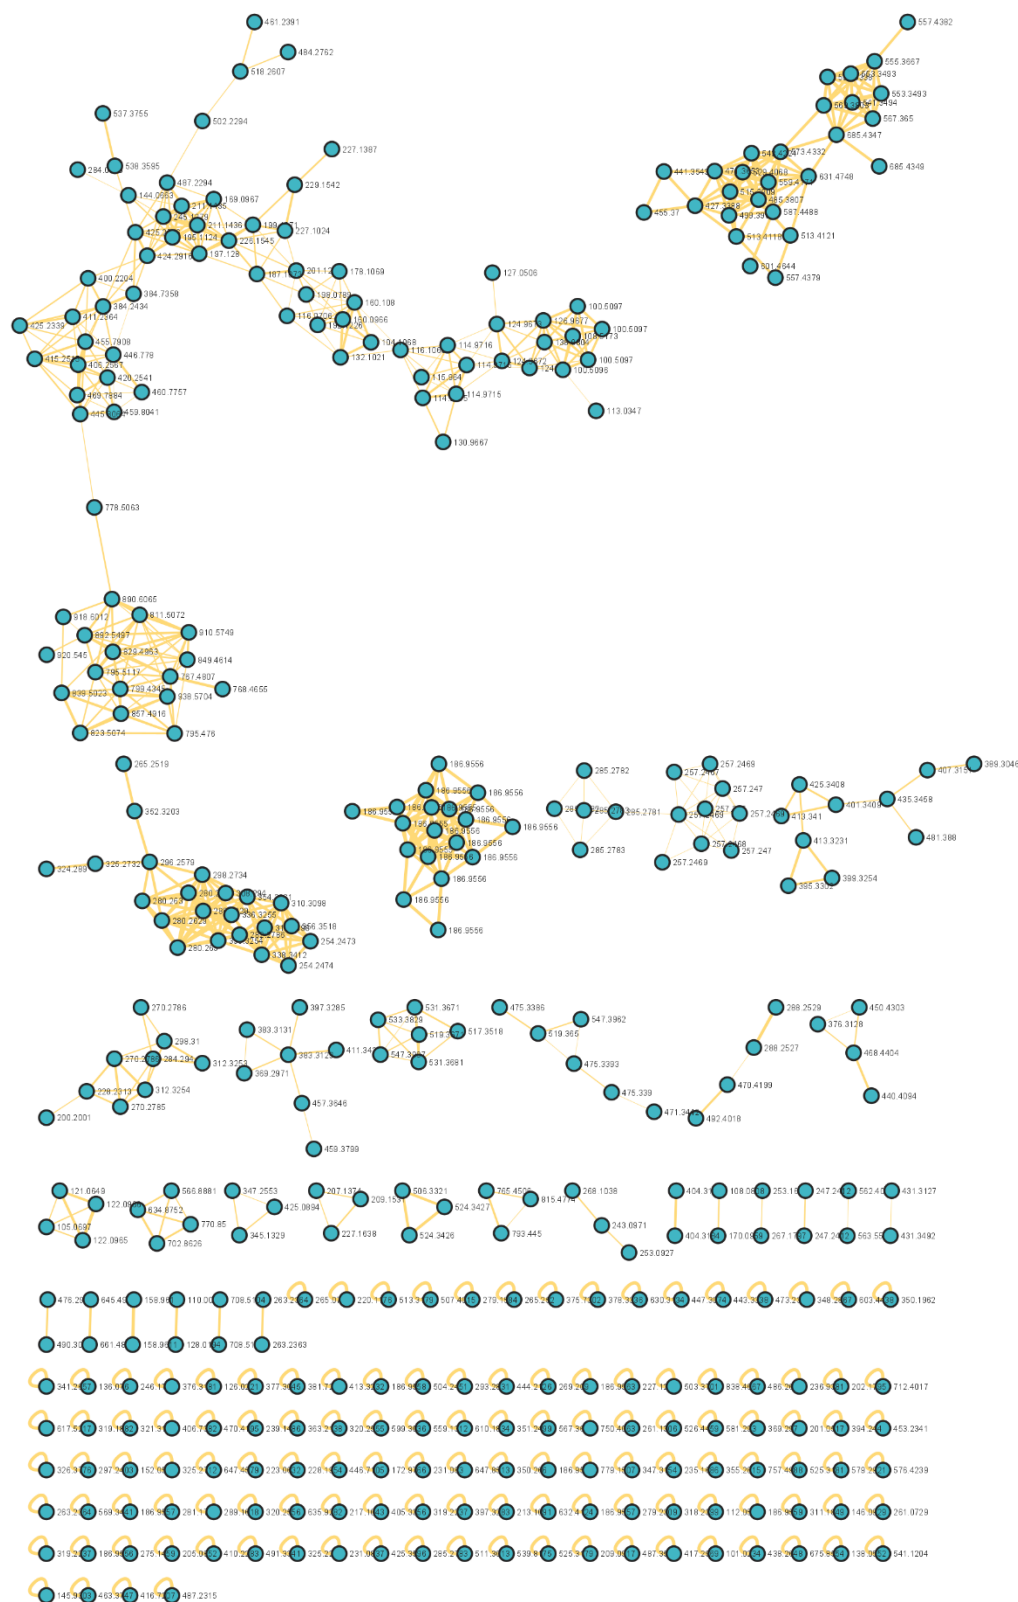

Supplement: s1 [file s1]
